# Supplementary material for: The effects of manipulating levels of replication initiation factors on origin firing efficiency in yeast
Source: PubMed Central journal article supplement (PMC6795477; doi:10.1371/journal.pgen.1008430), 2019-10-04

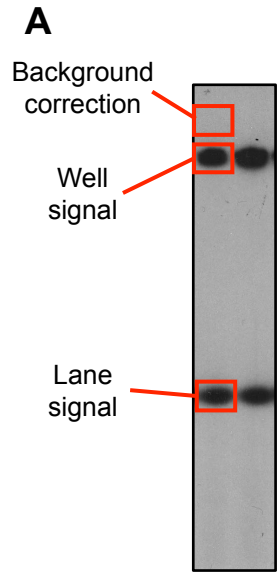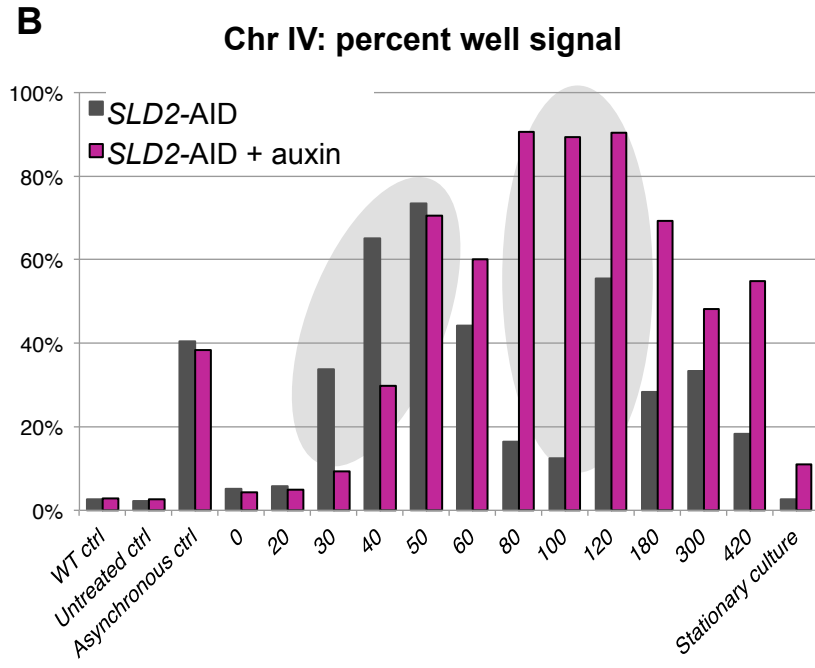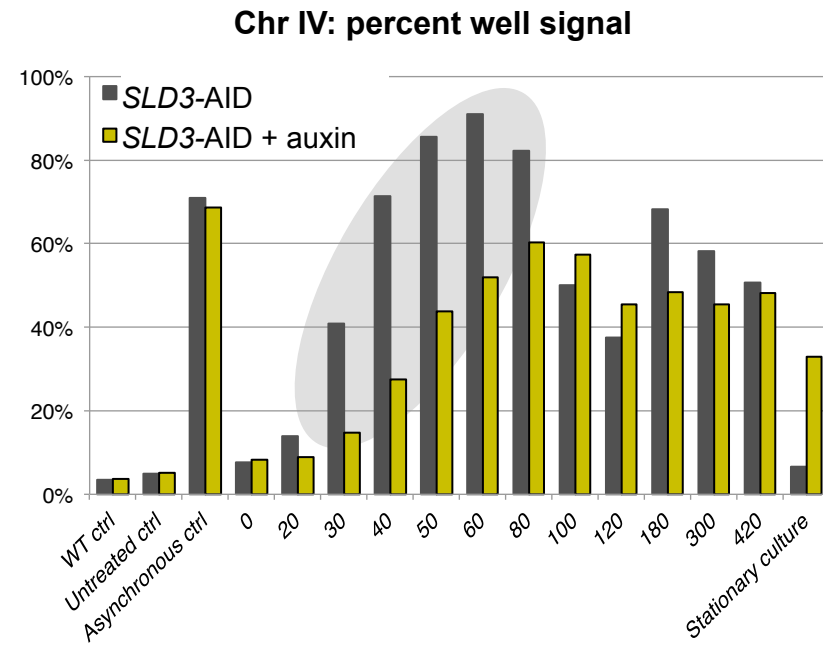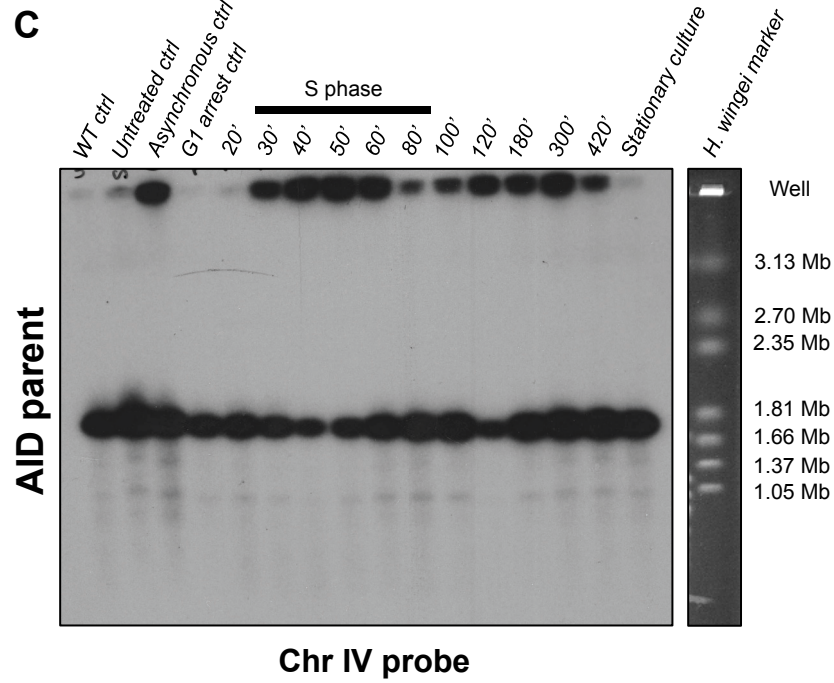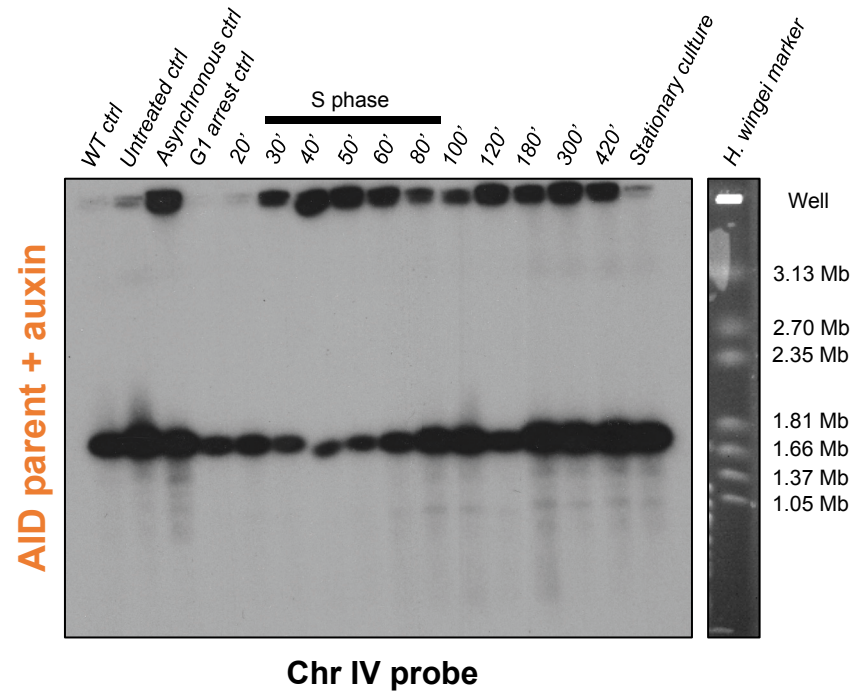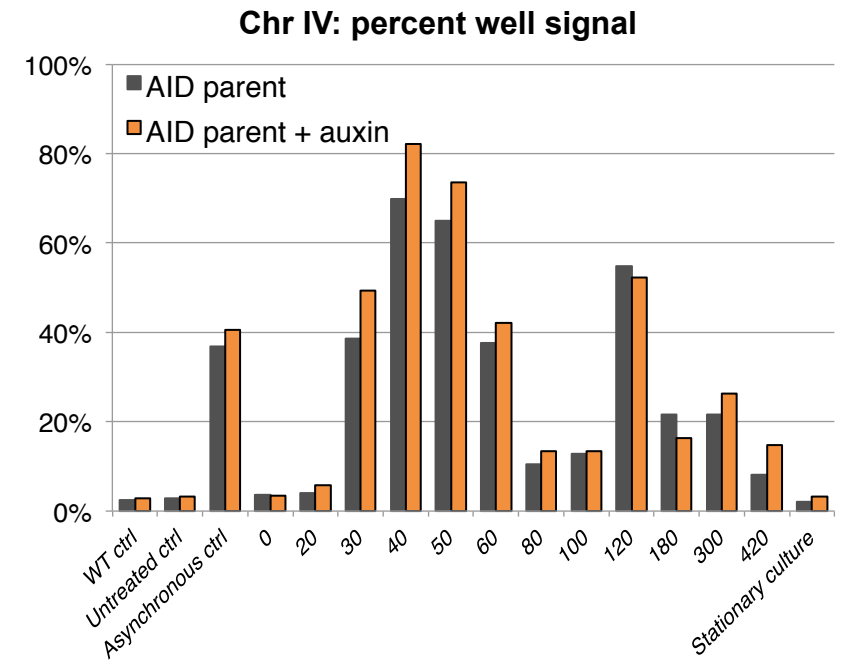

**D****Chr XII: percent well signal**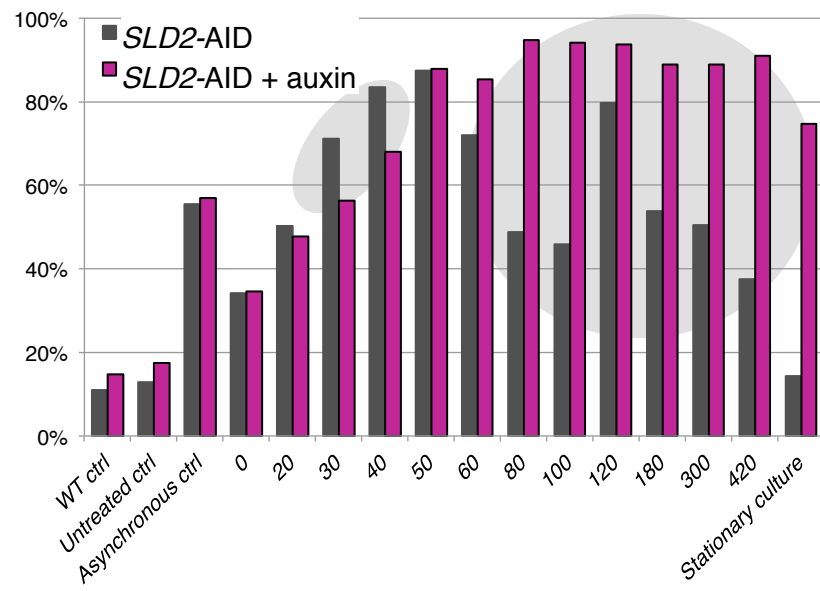**Chr XII: percent well signal**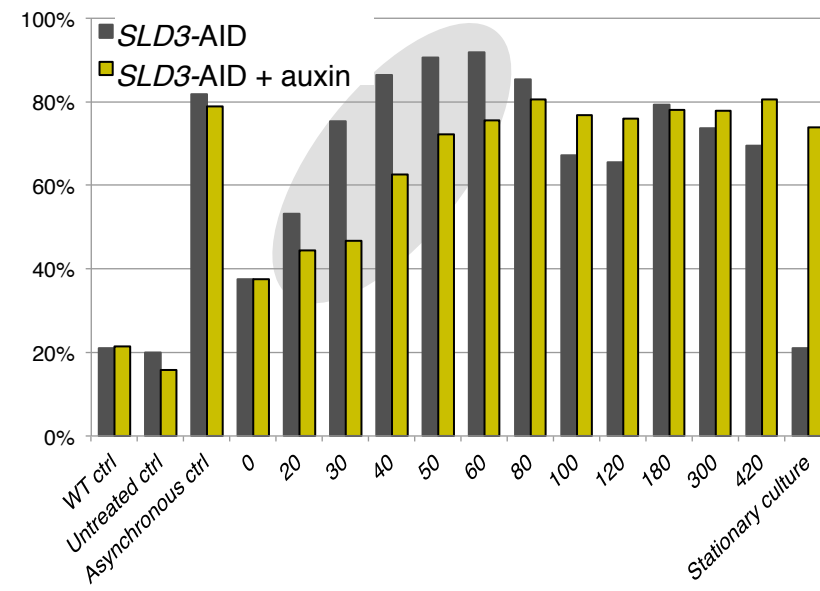**E**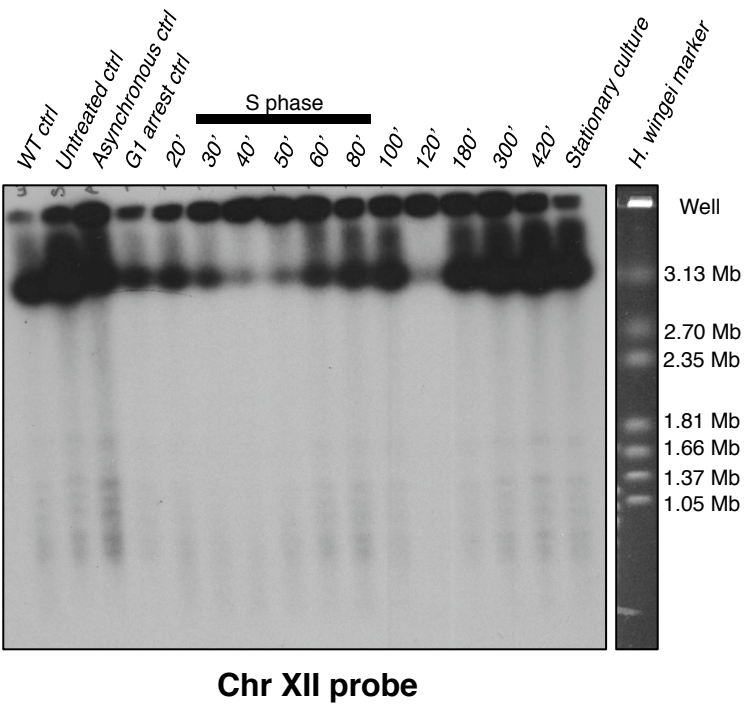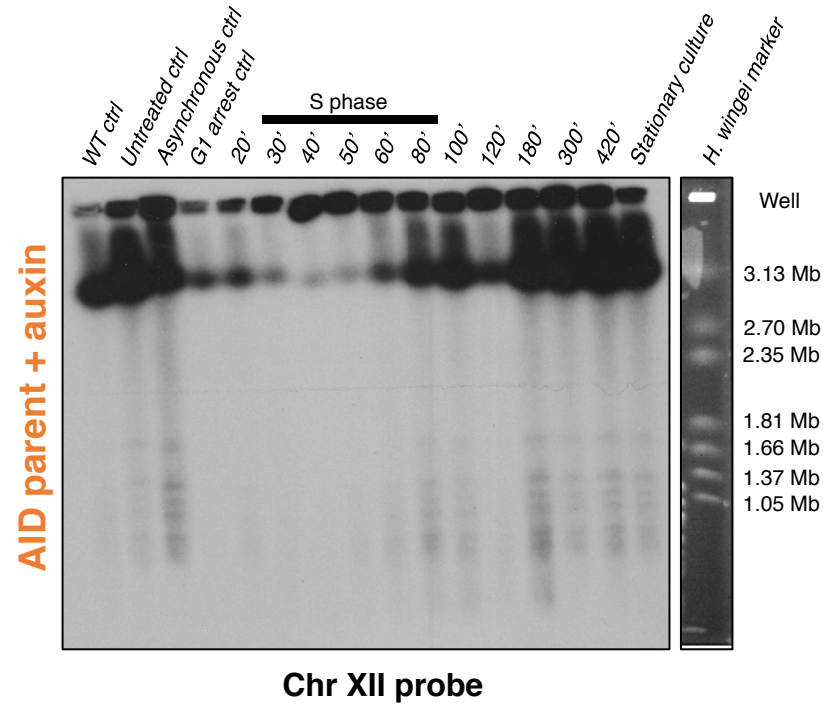**Chr XII: percent well signal**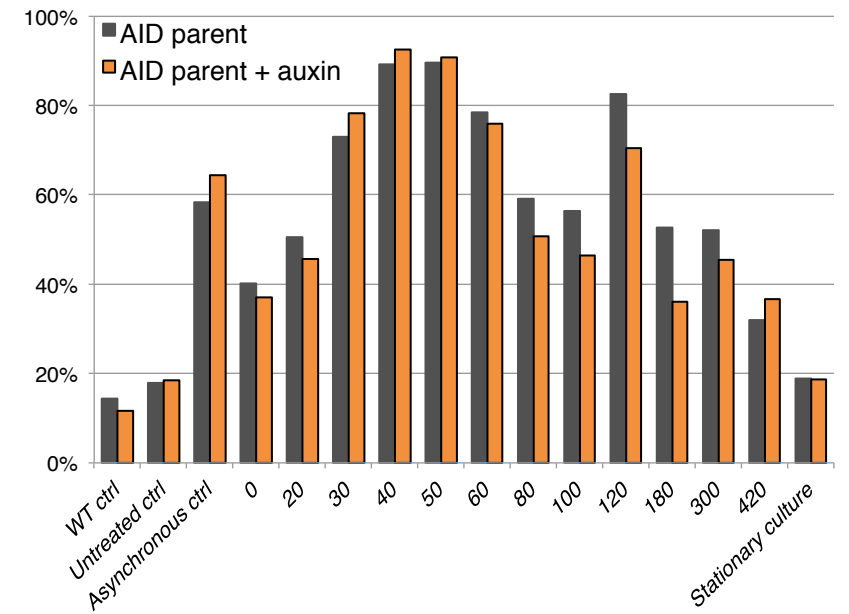

F

**Chromosome XV probe**

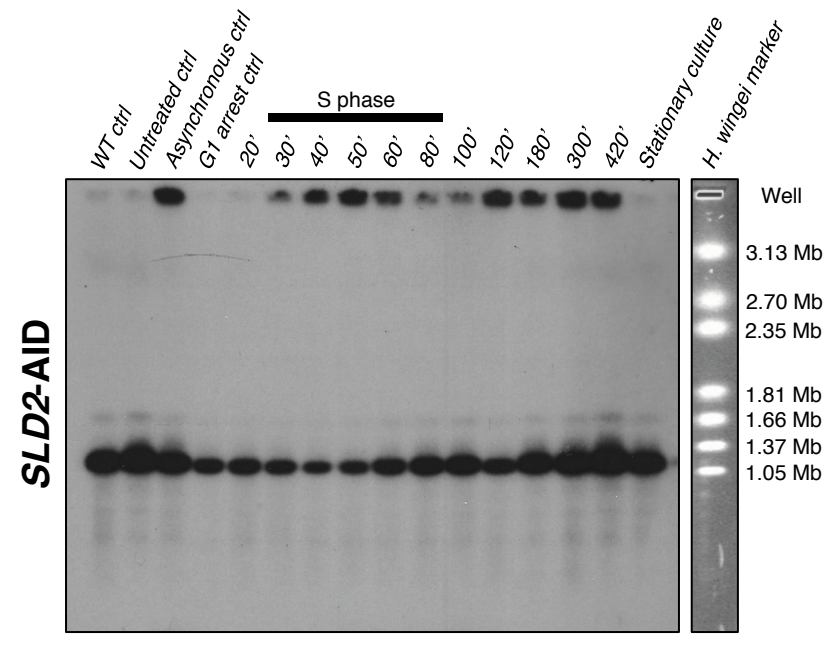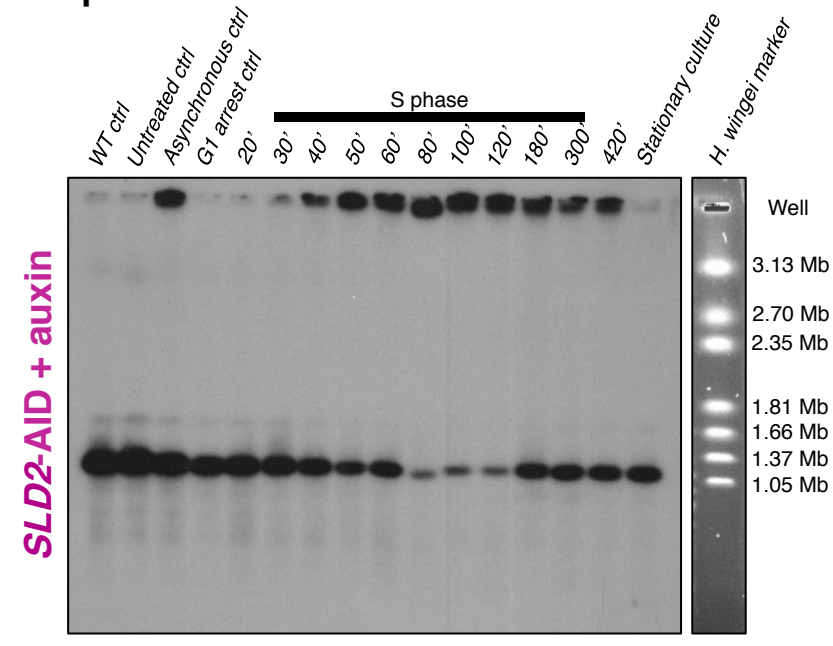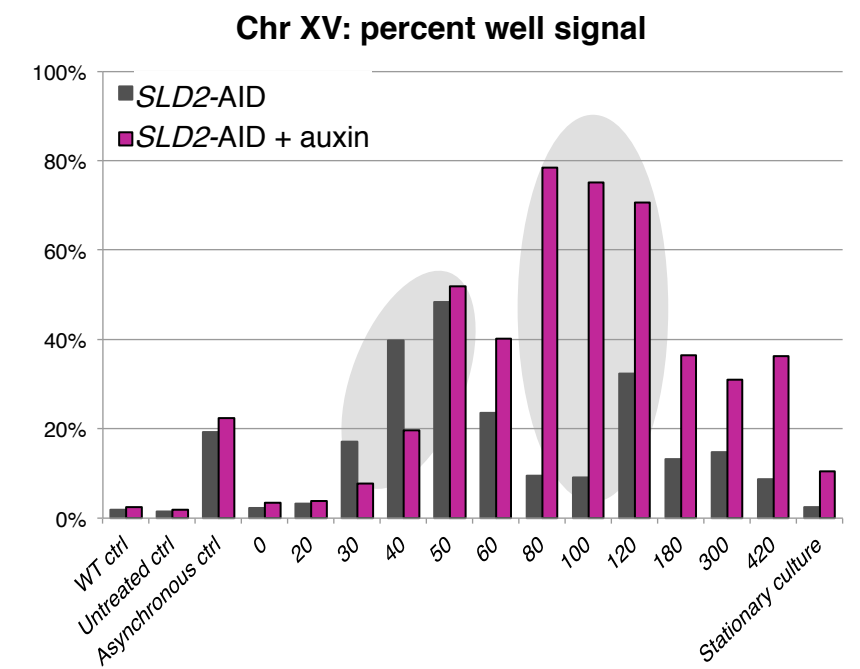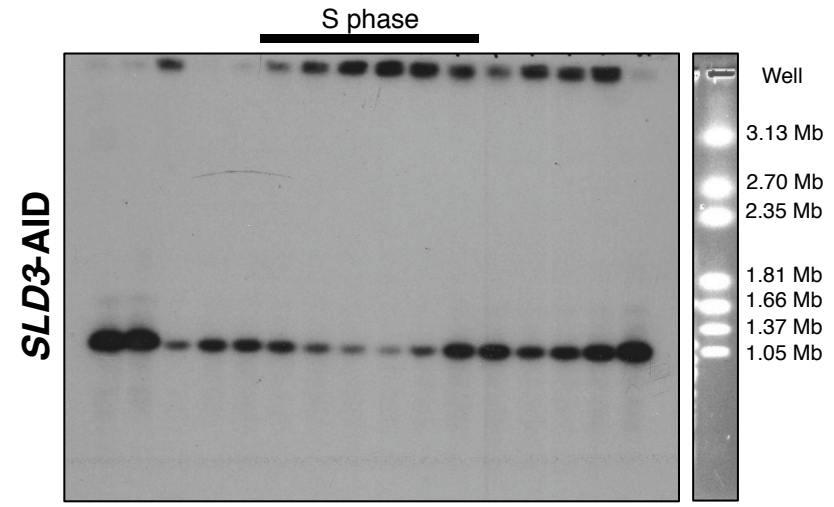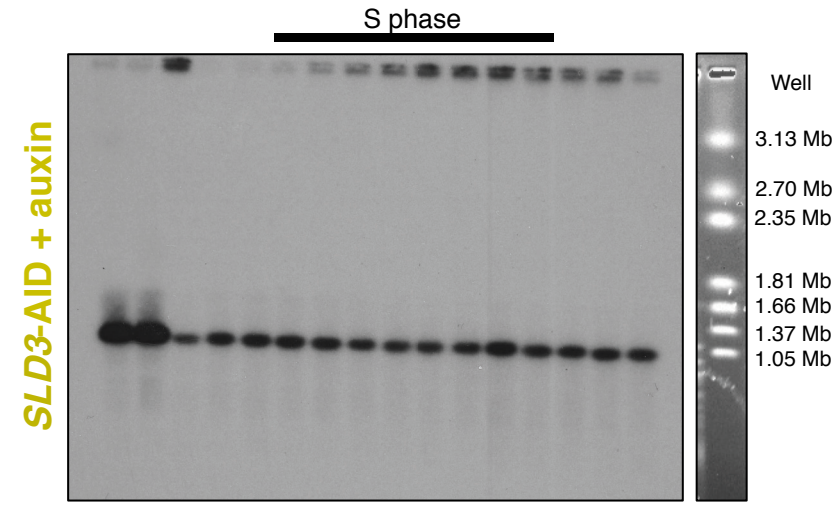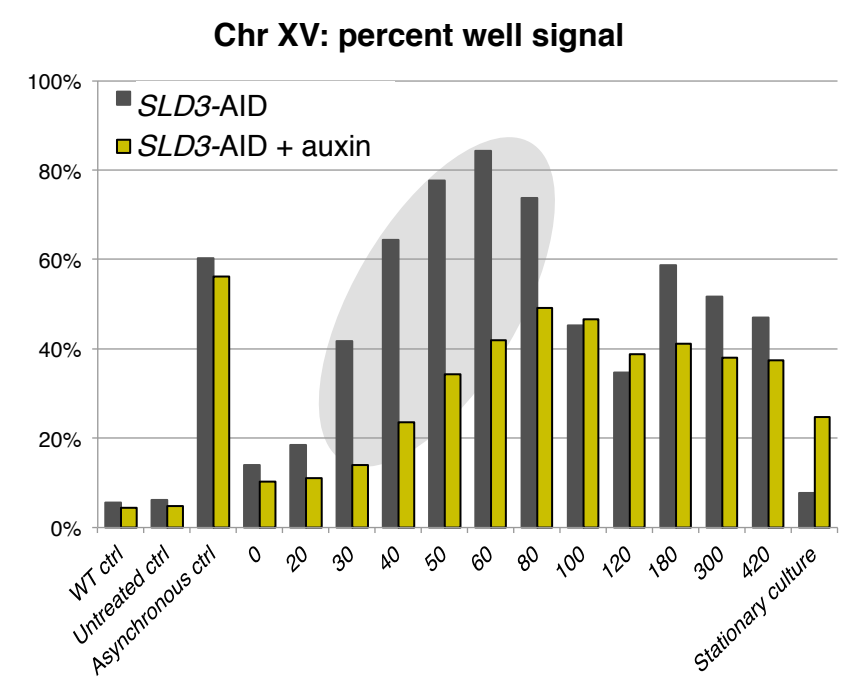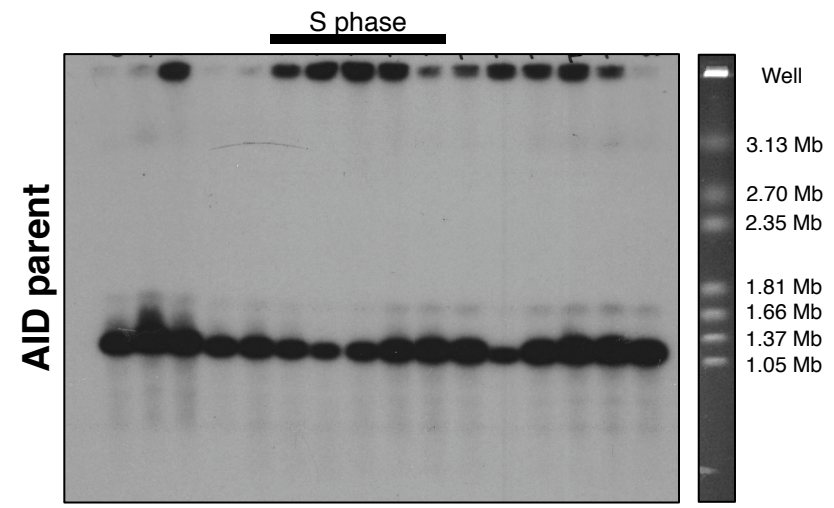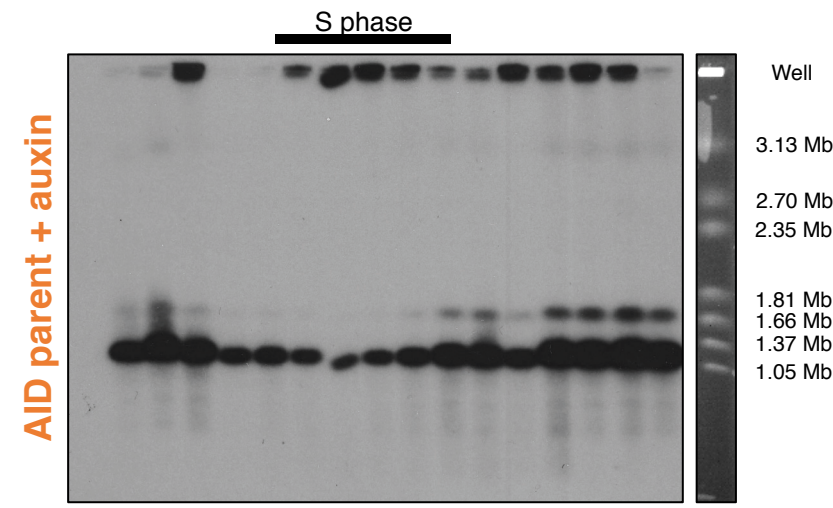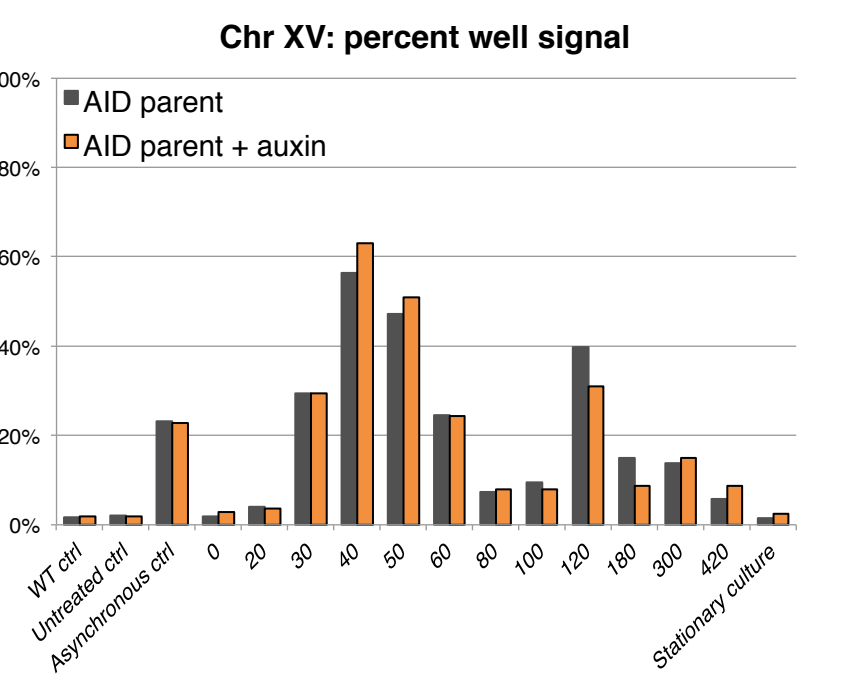

G

## Chromosome X probe

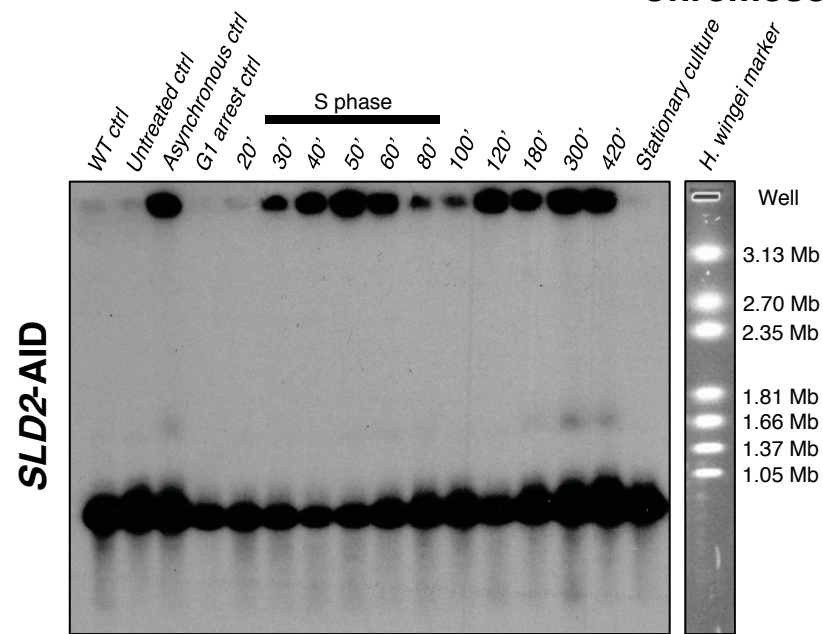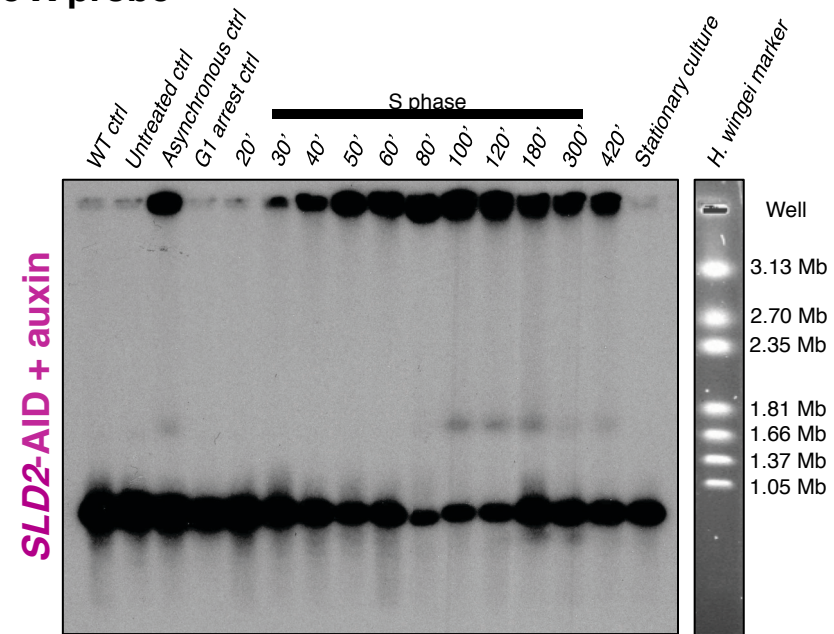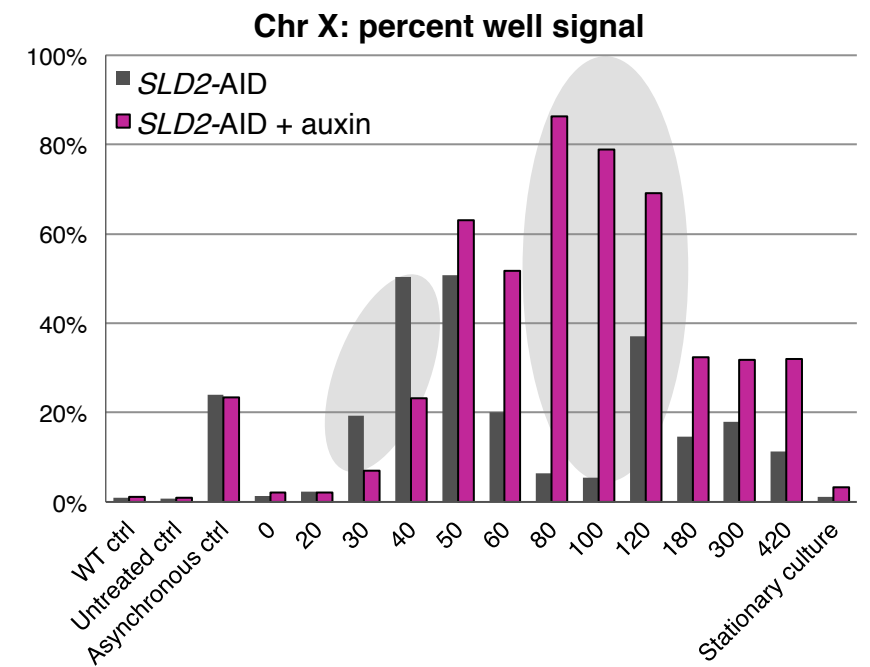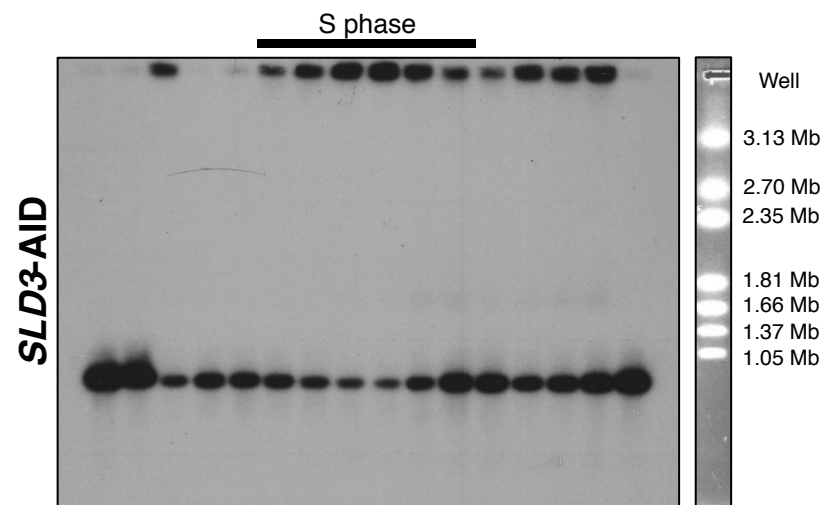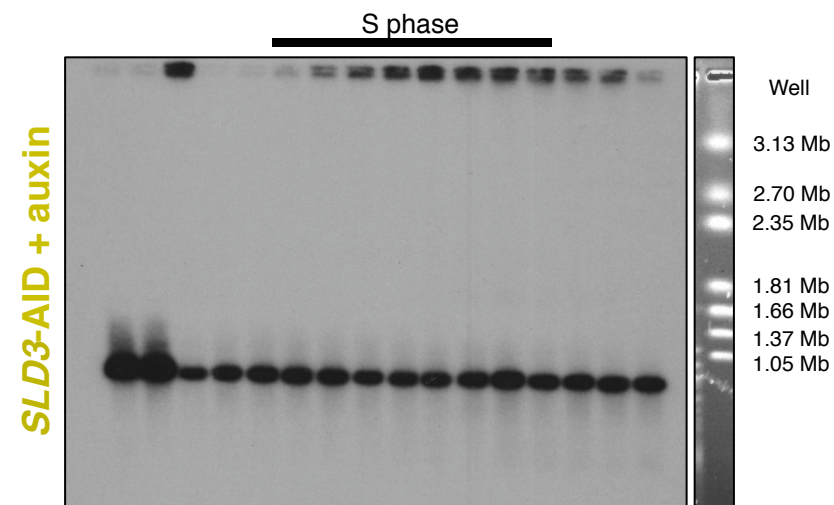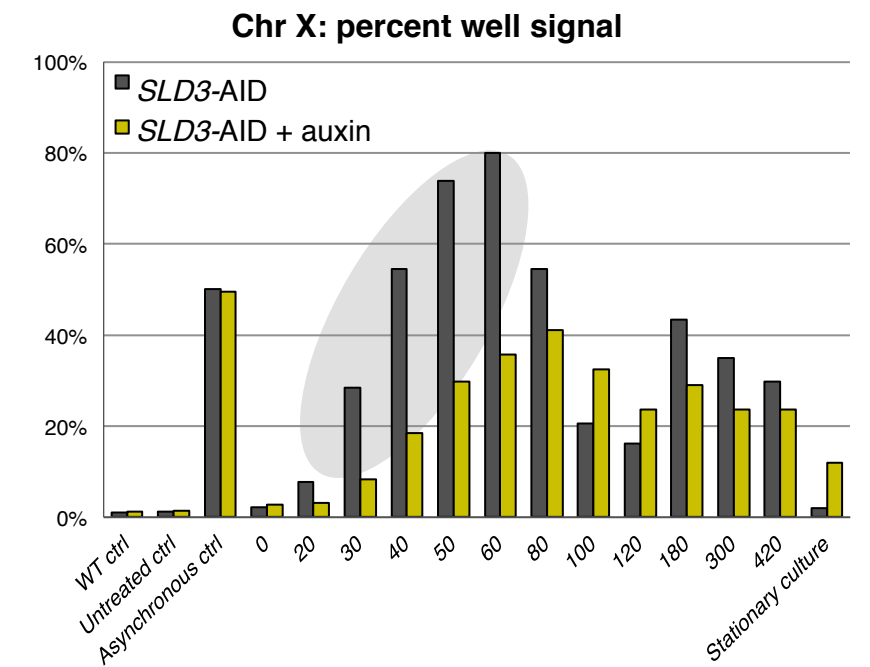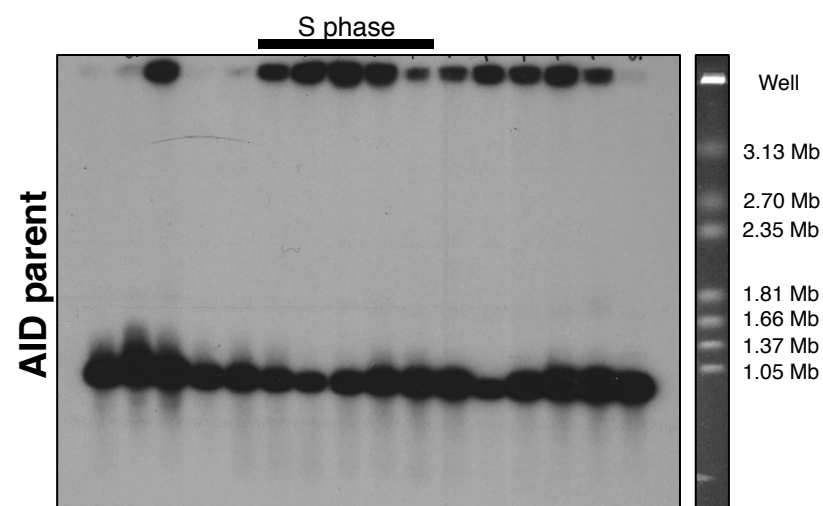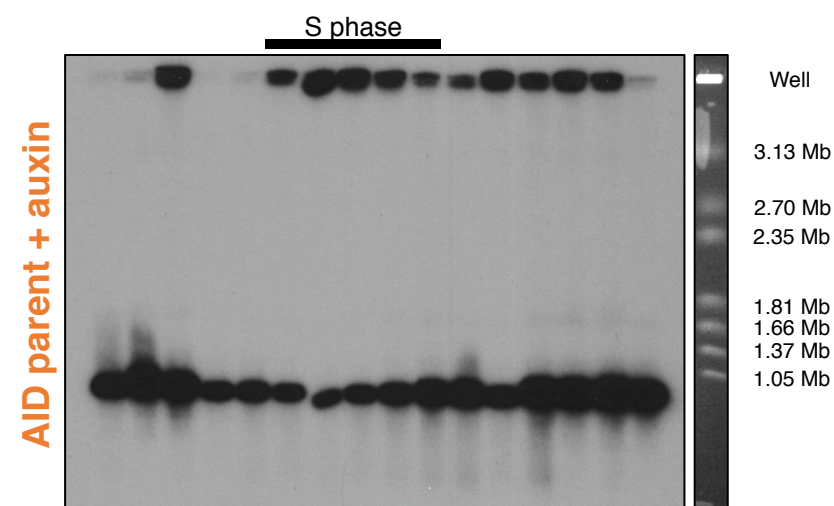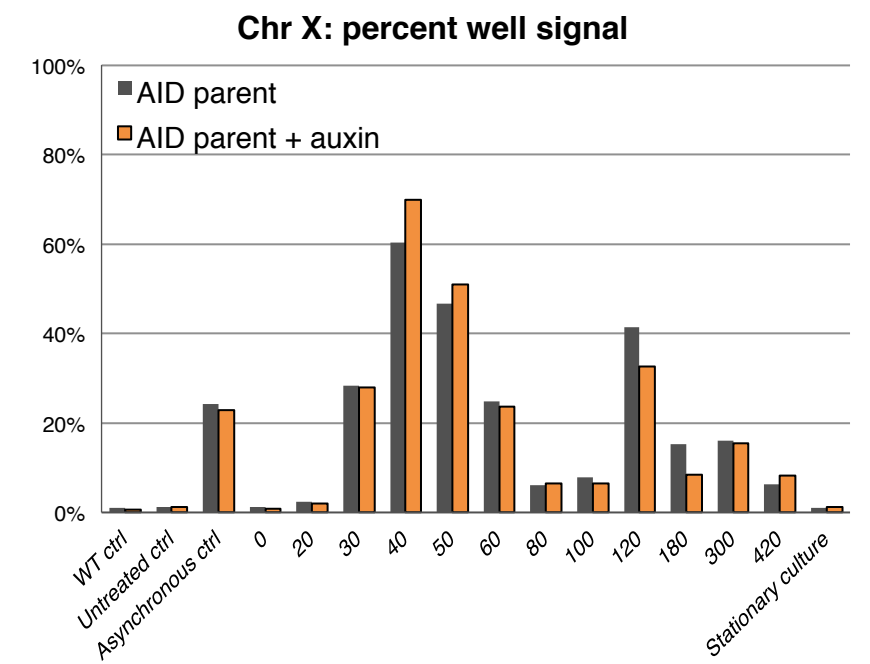

H

## Chromosome III probe

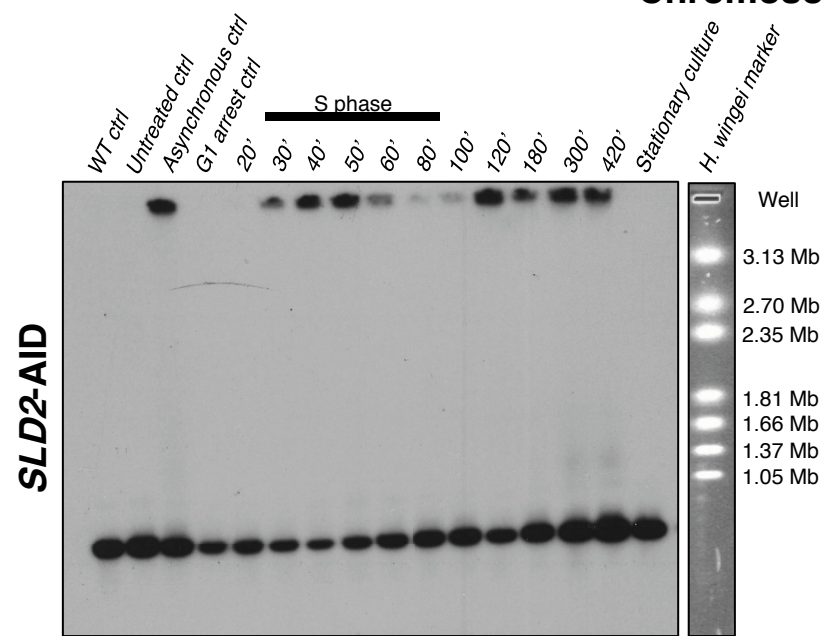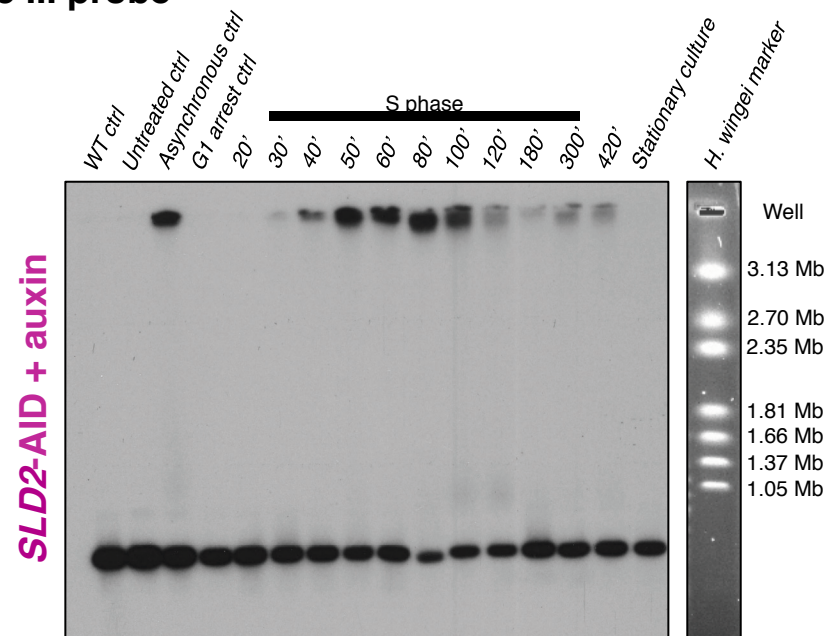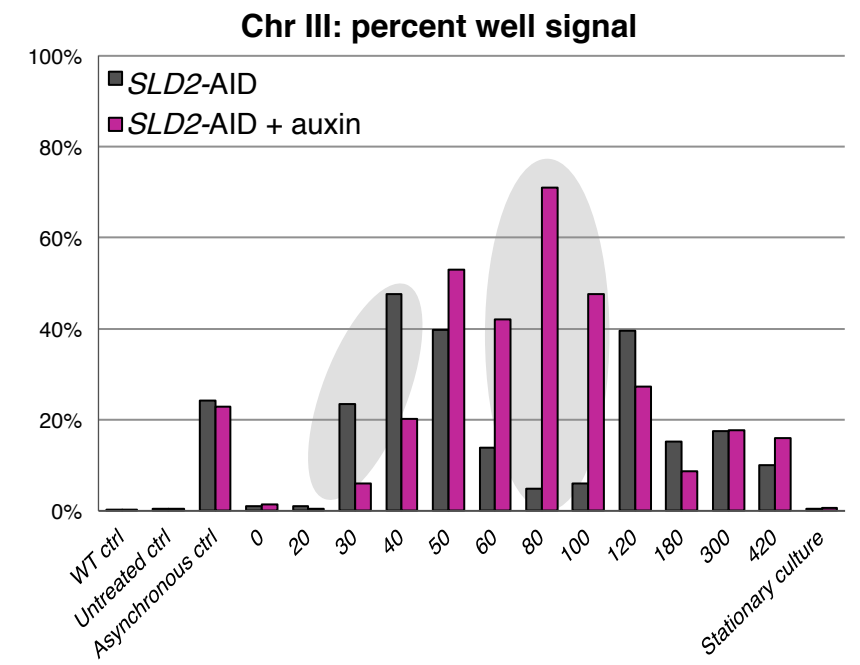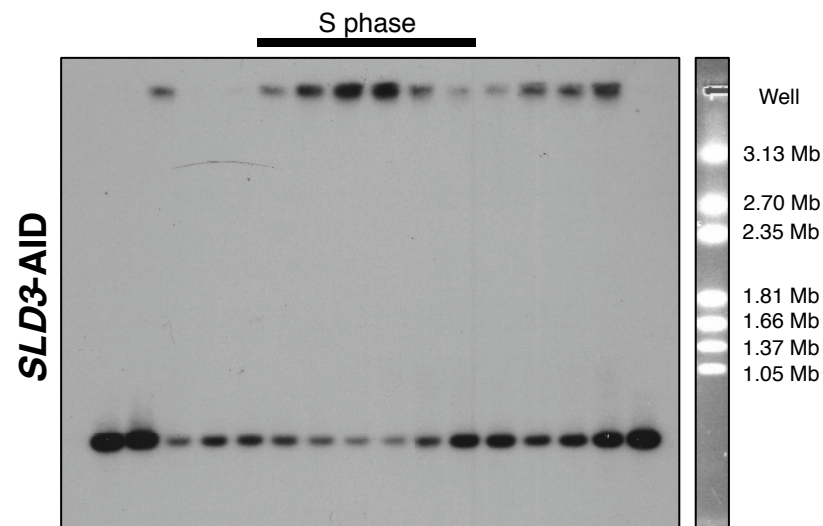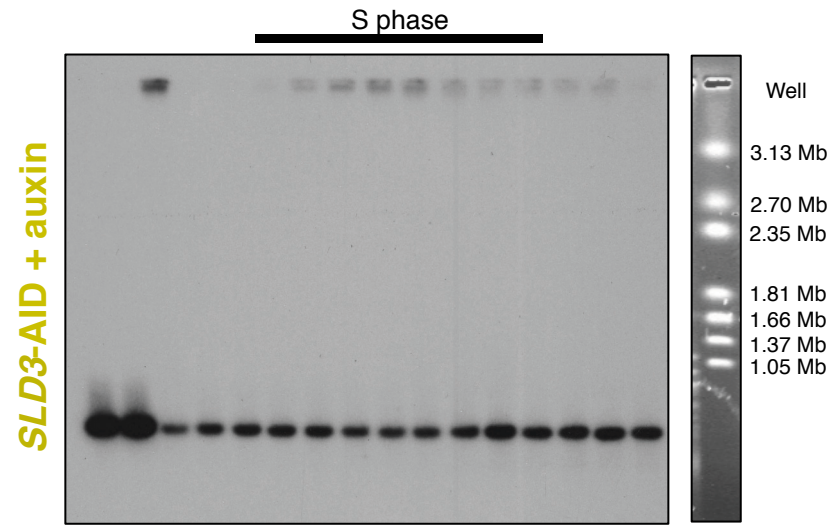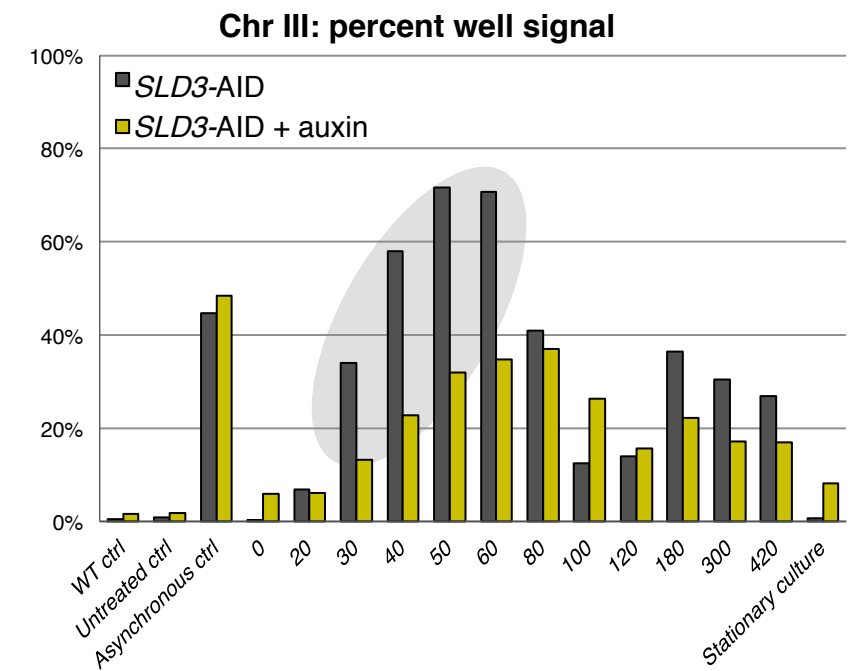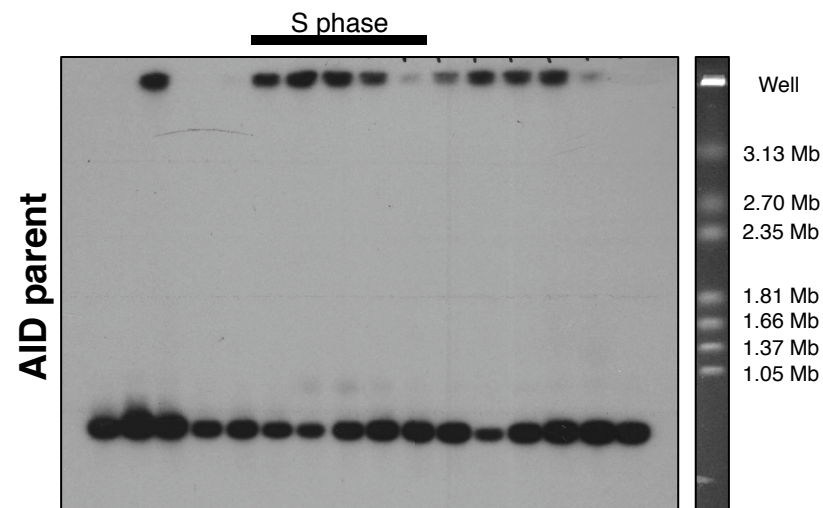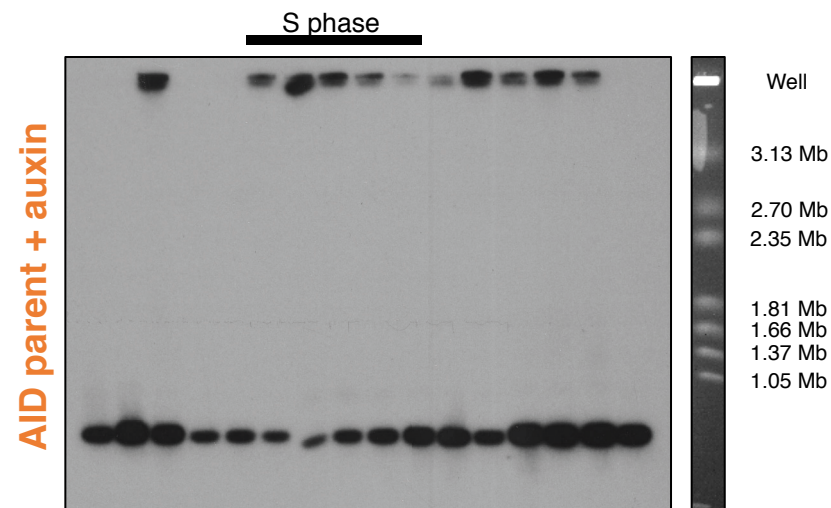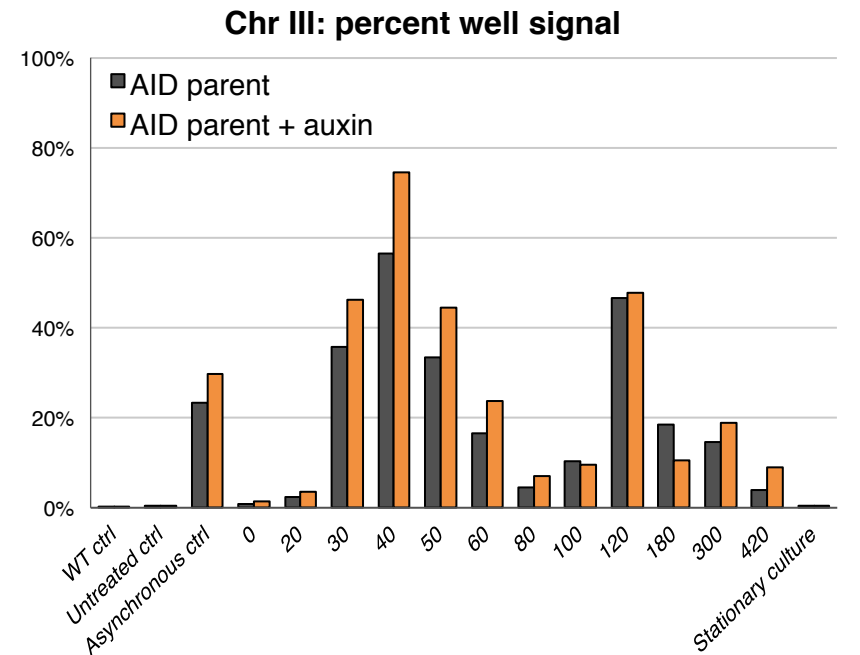

I

## Mitochondrial DNA probe

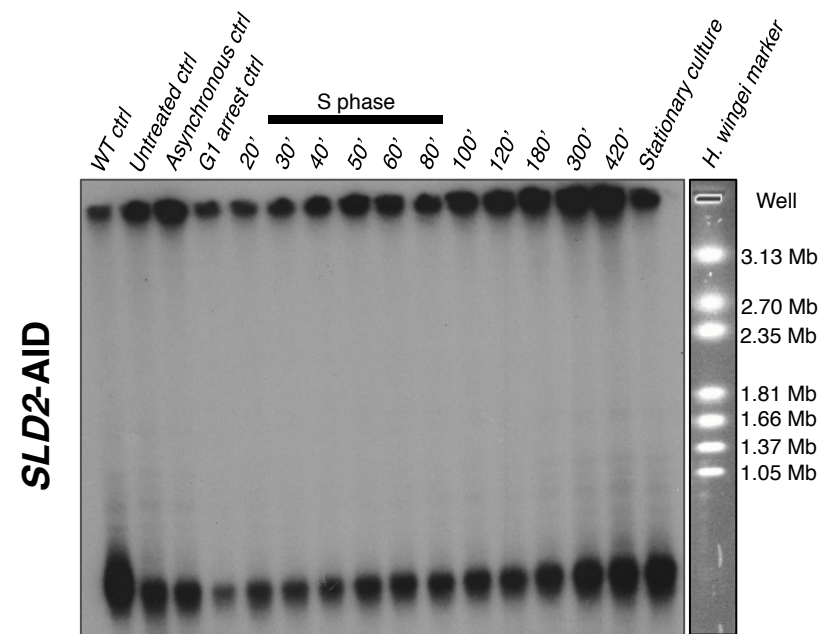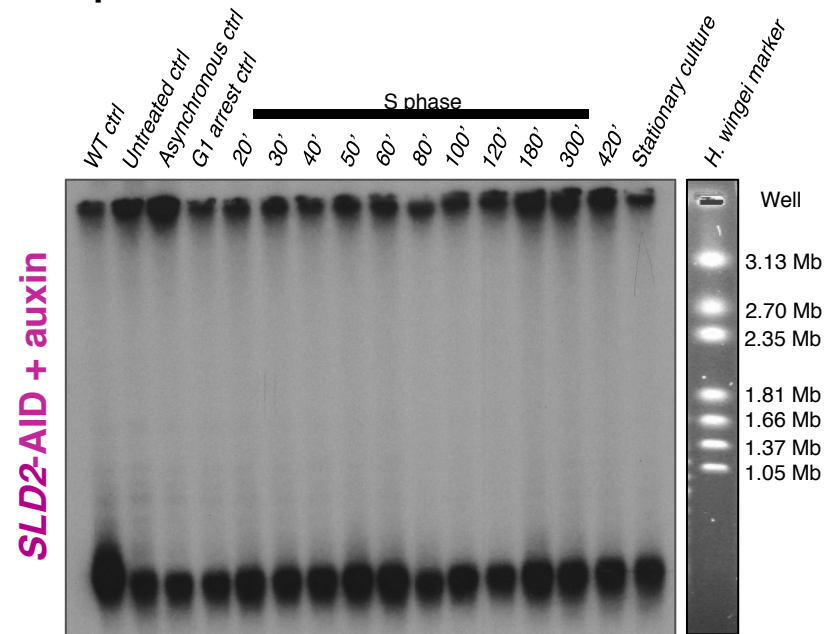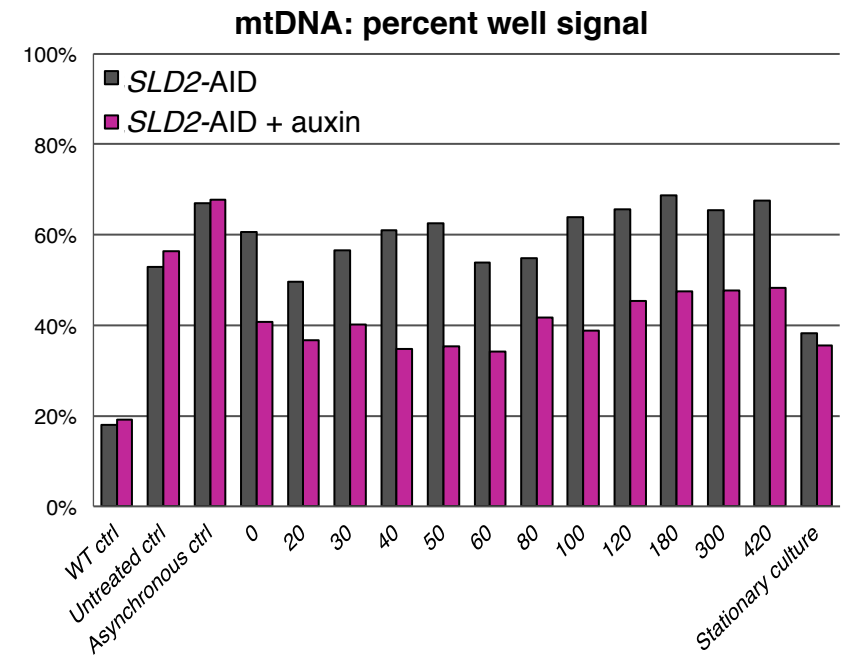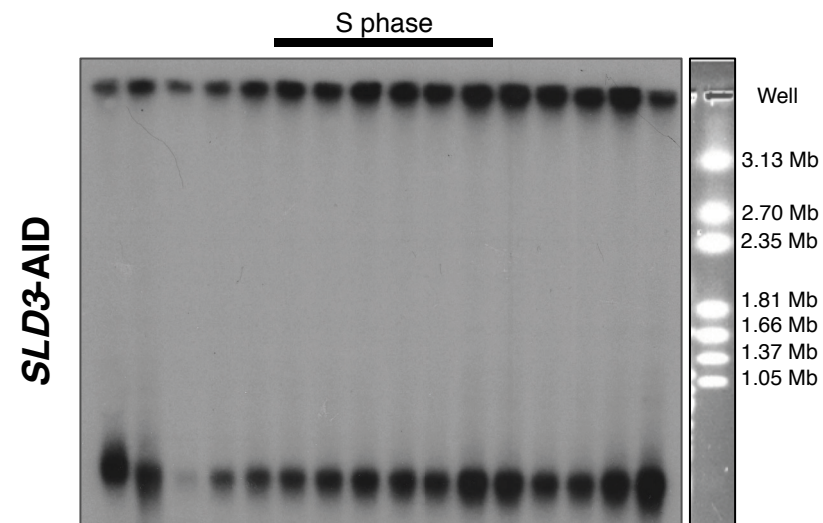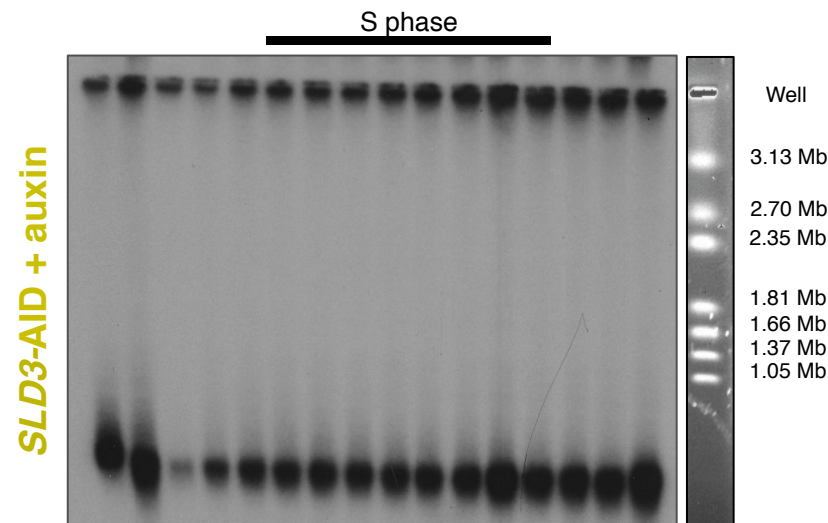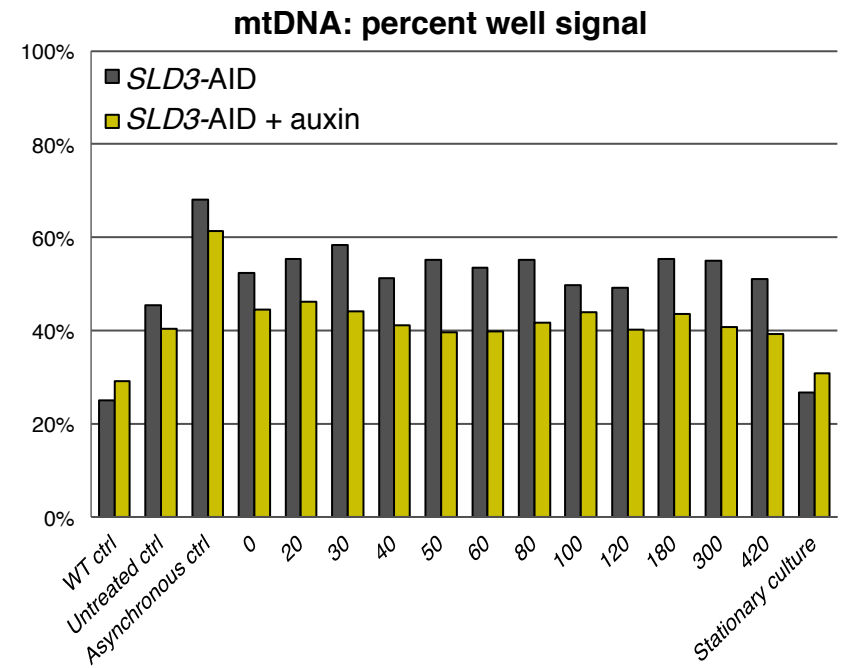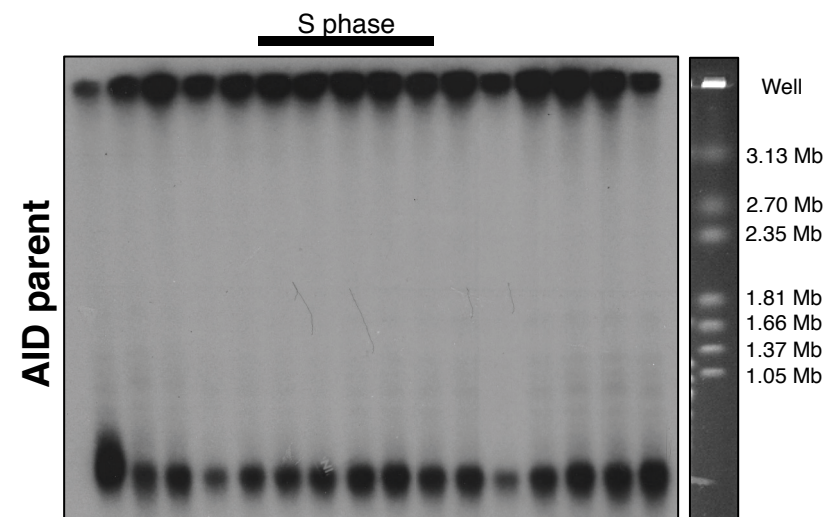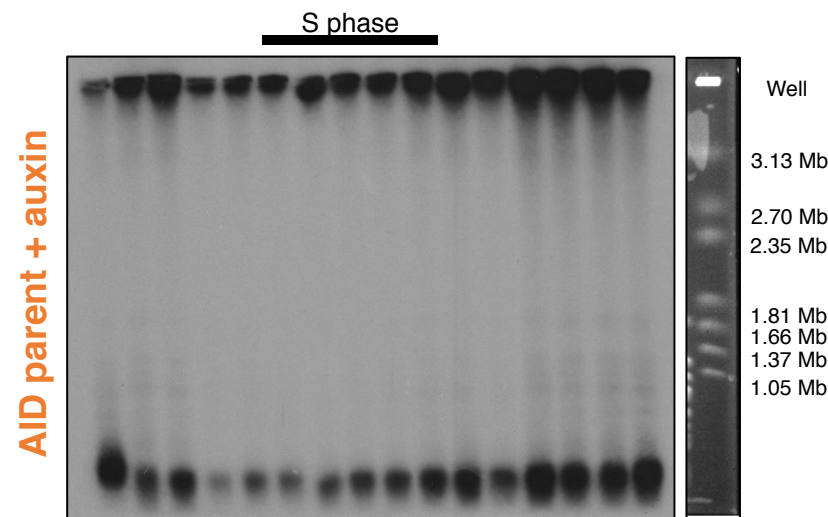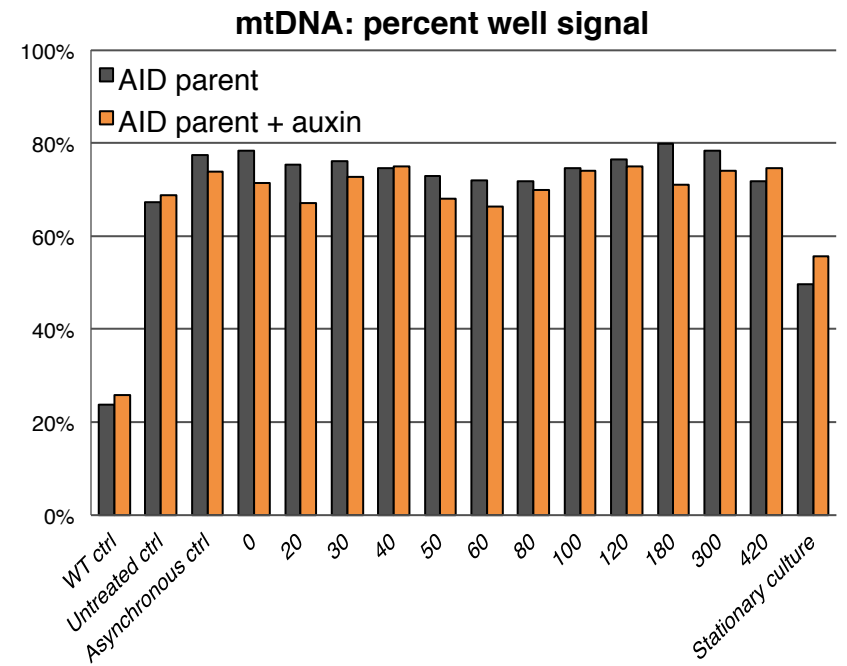

Supplement: pgen.1008430.s002.pdf [file pgen.1008430.s002.pdf]
