# Supplementary material for: The effects of manipulating levels of replication initiation factors on origin firing efficiency in yeast
Source: PubMed Central journal article supplement (PMC6795477; doi:10.1371/journal.pgen.1008430), 2019-10-04

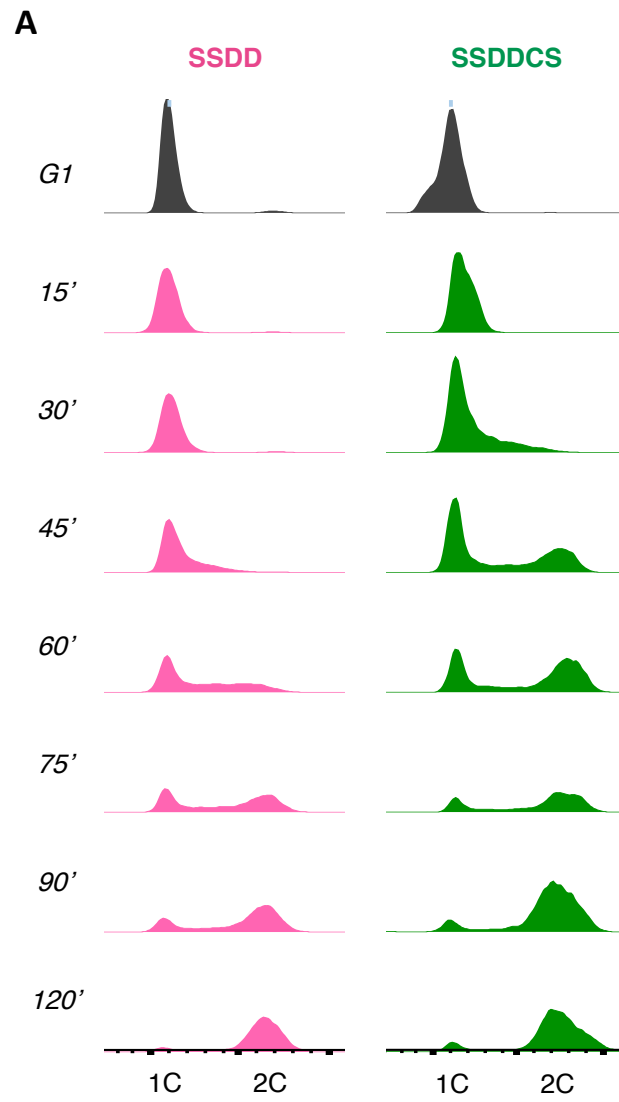

**B**

WT, SSDD overexpression &  
SSDDCS overexpression ssDNA  
assay replication profiles

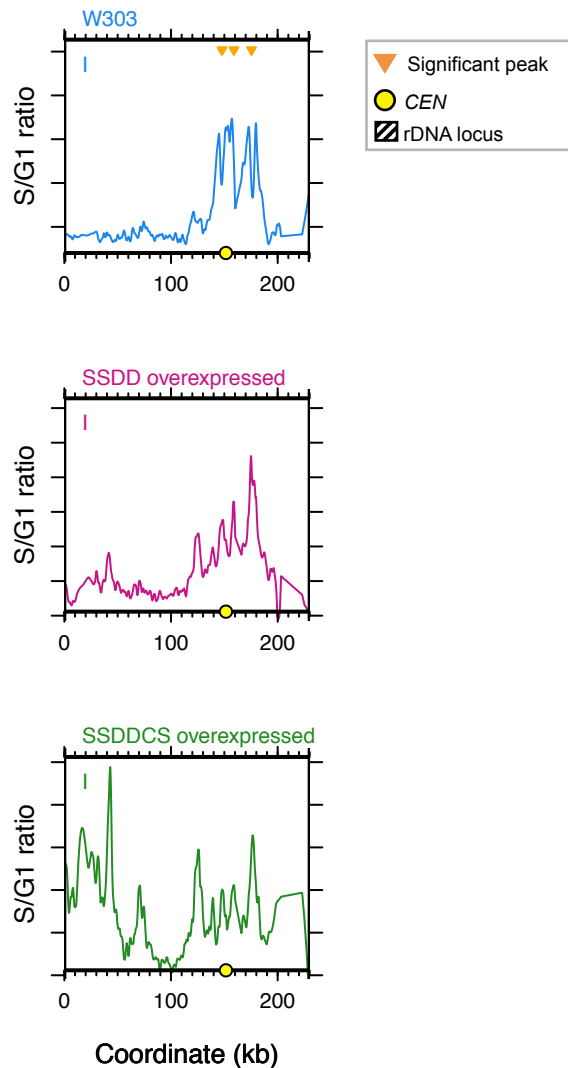

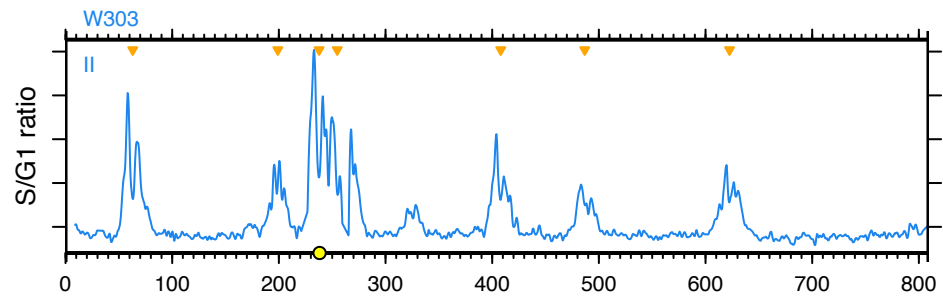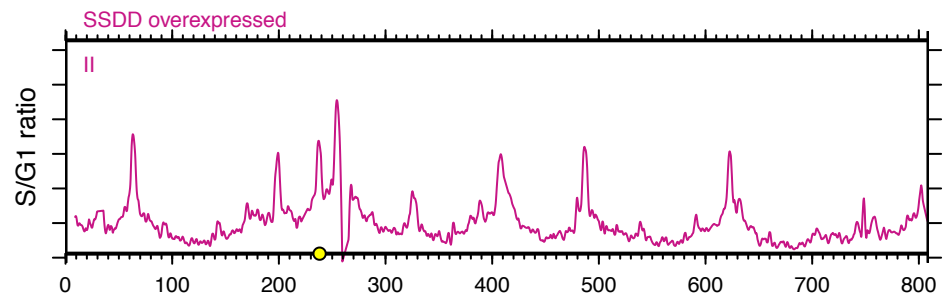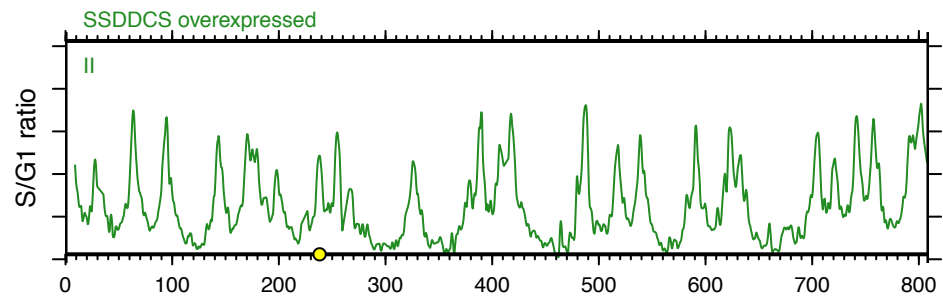

Coordinate (kb)

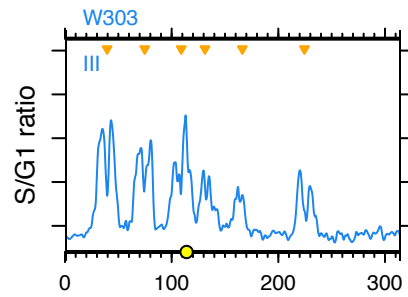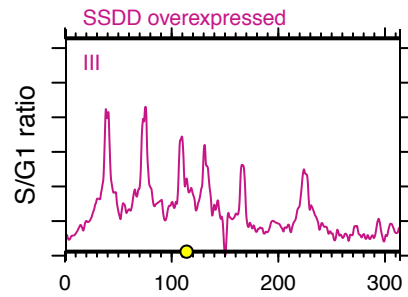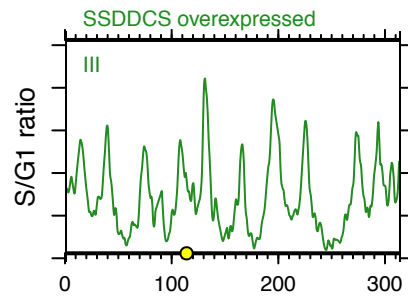

Coordinate (kb)

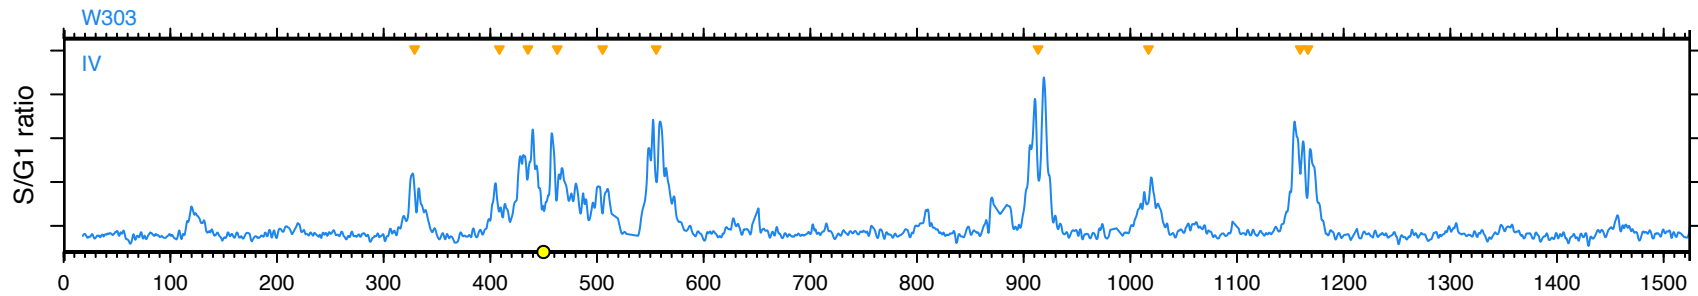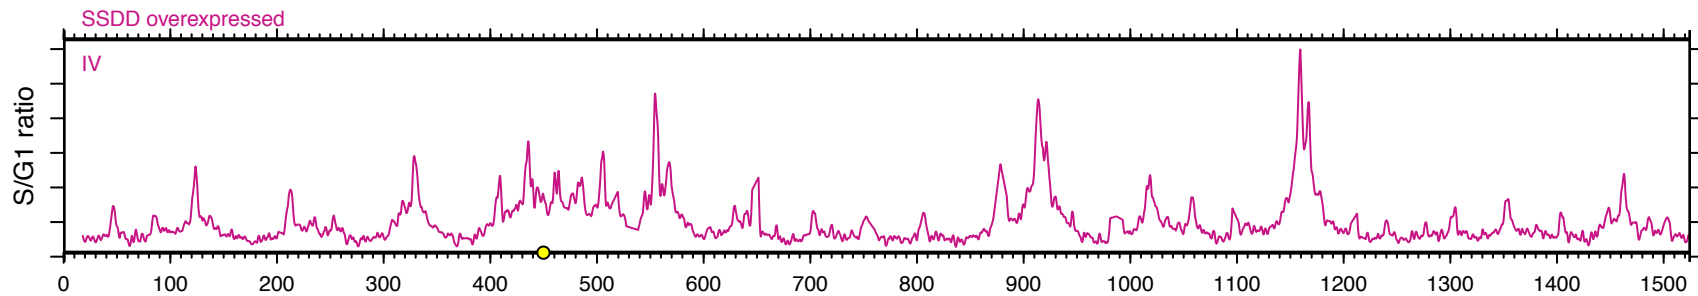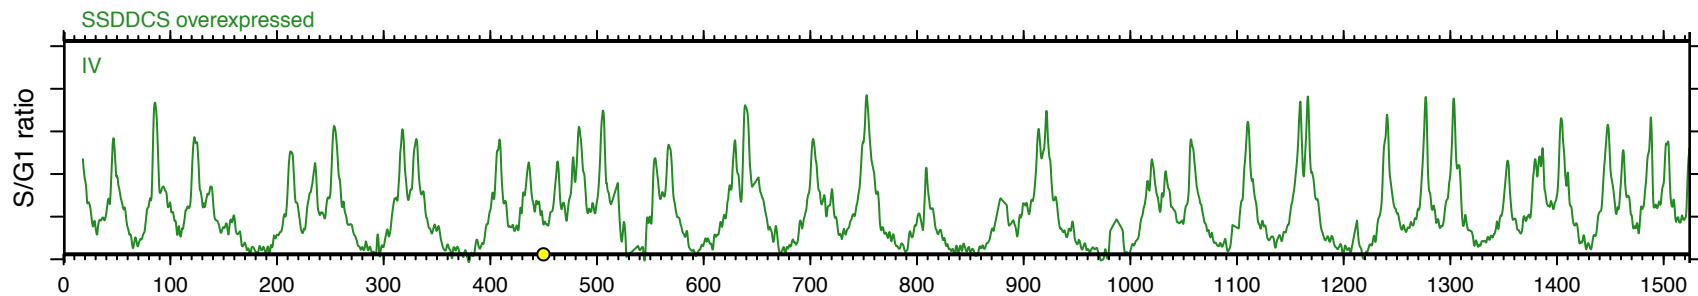

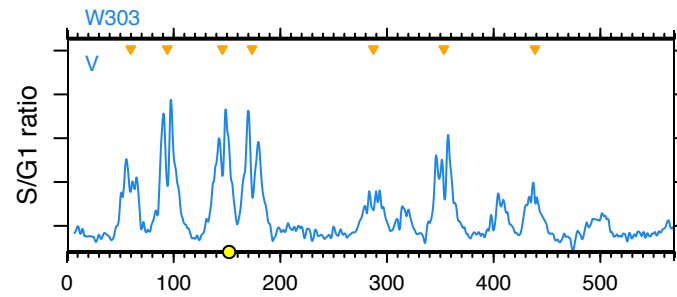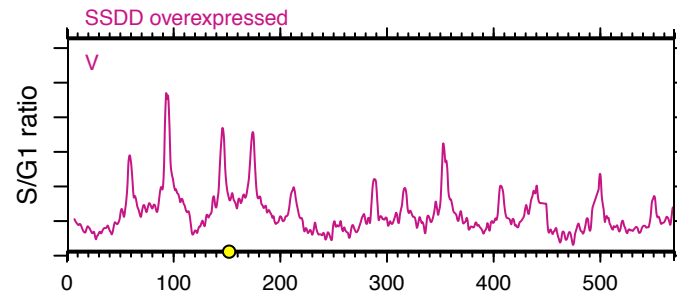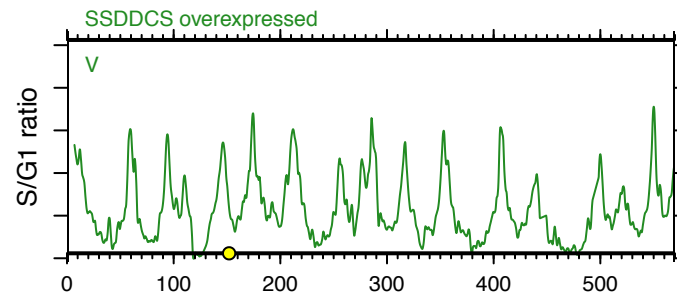

Coordinate (kb)

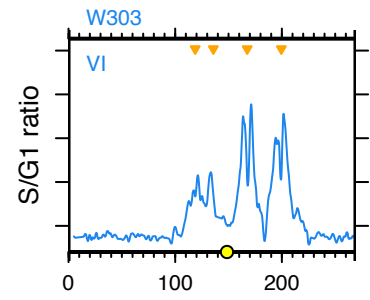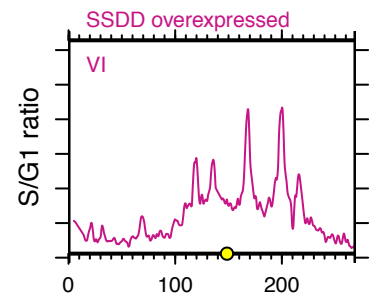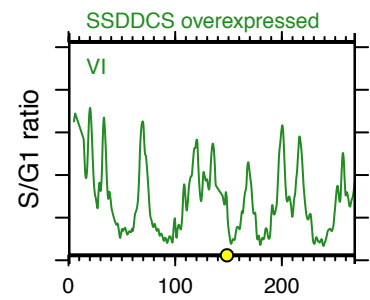

Coordinate (kb)

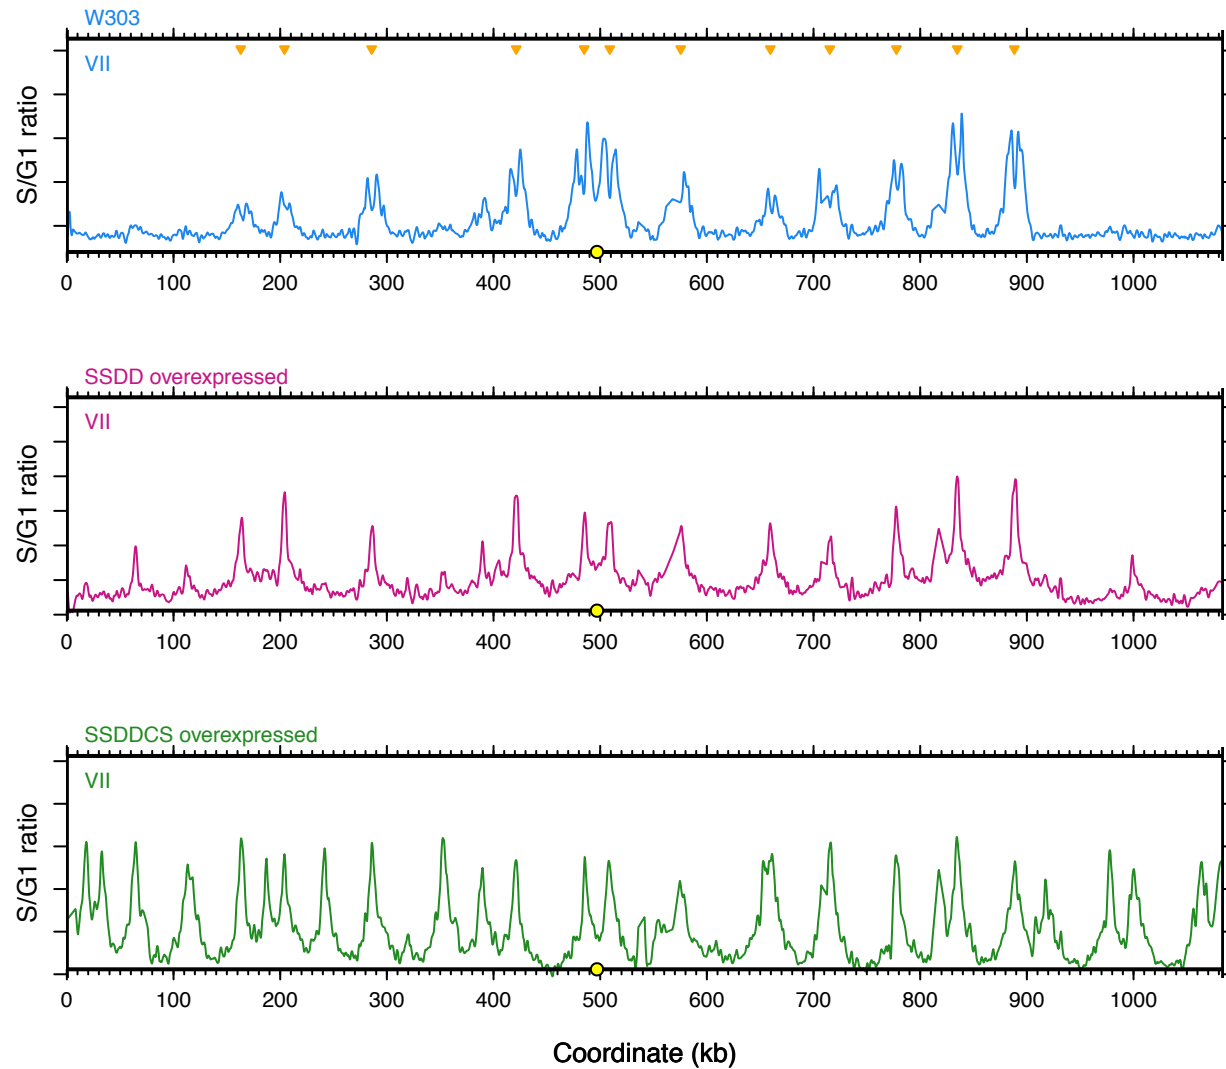



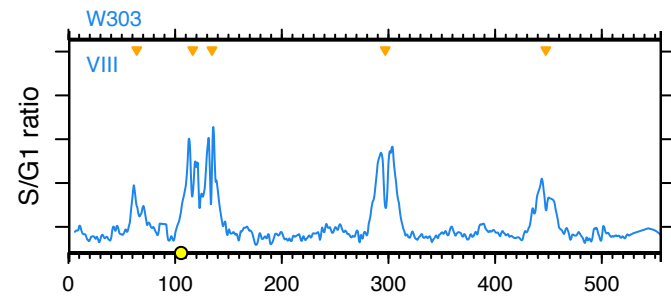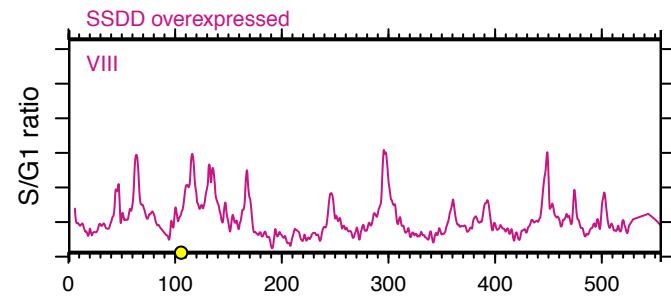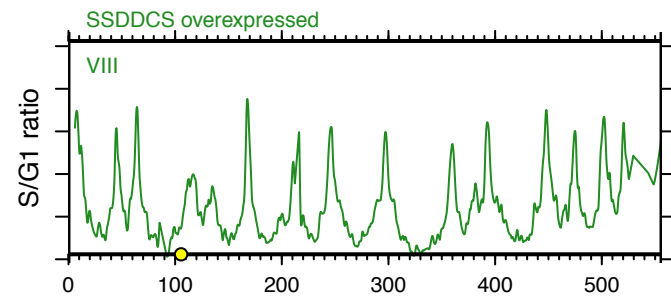

Coordinate (kb)

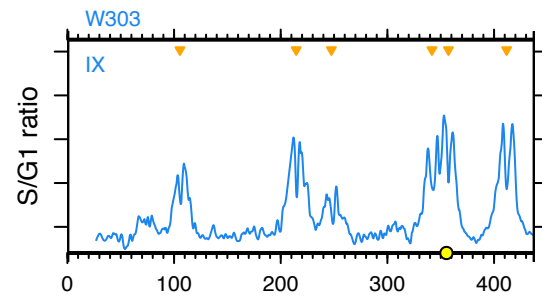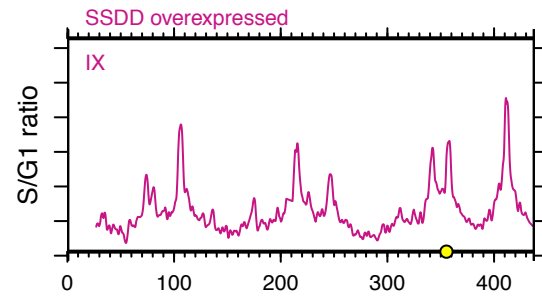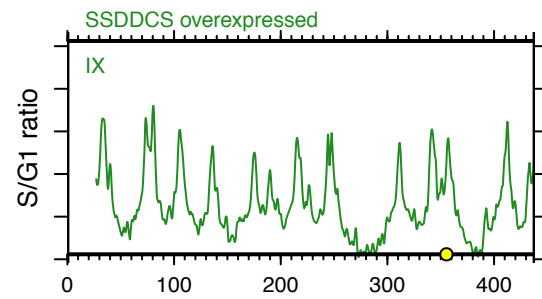

Coordinate (kb)

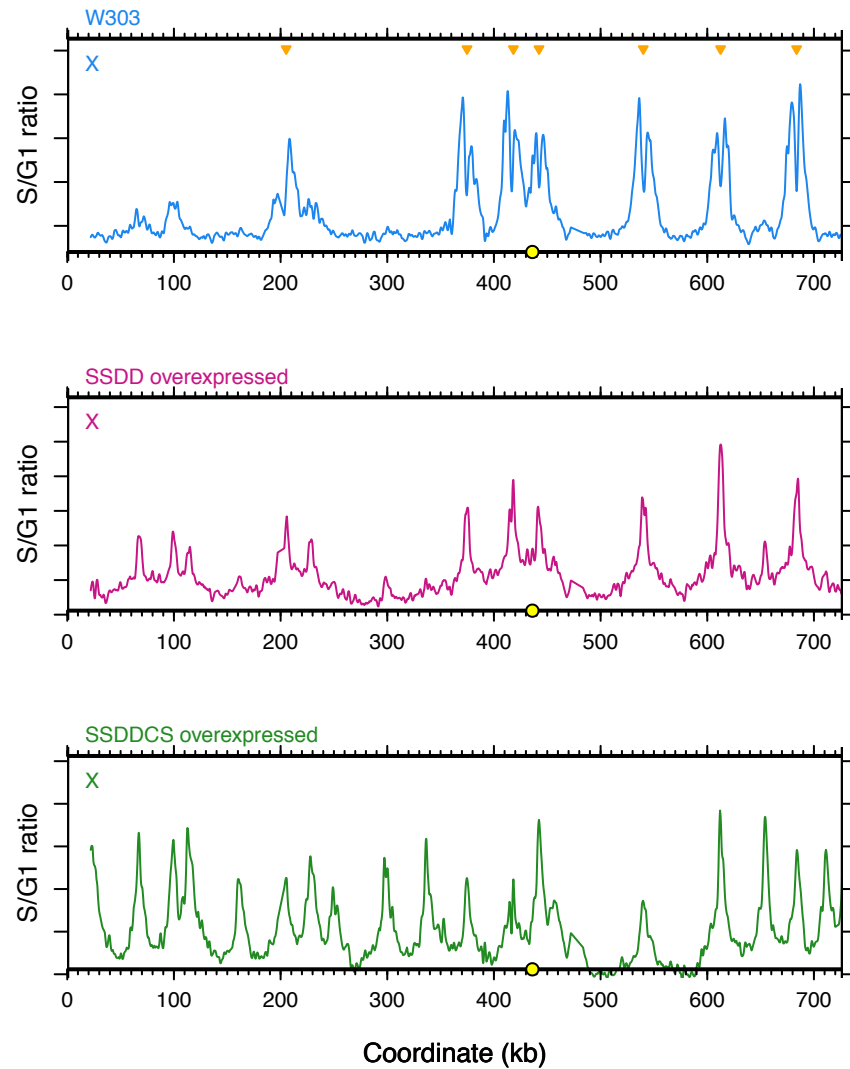

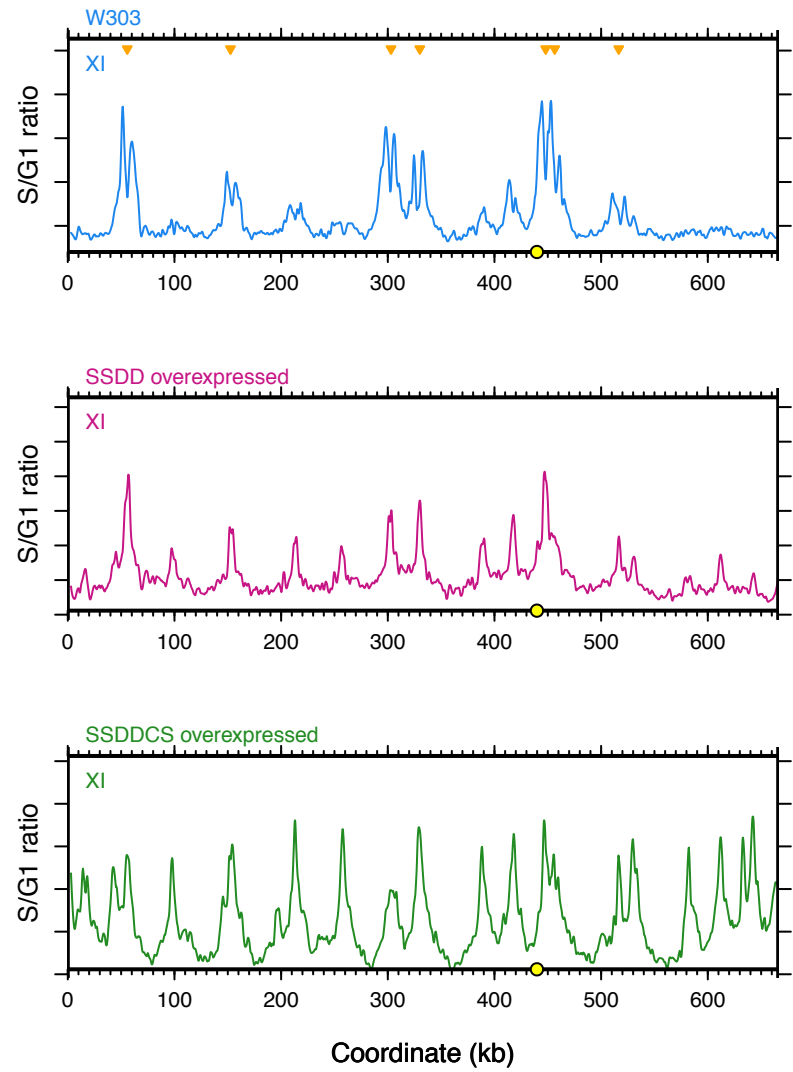

Lynch S12 Fig

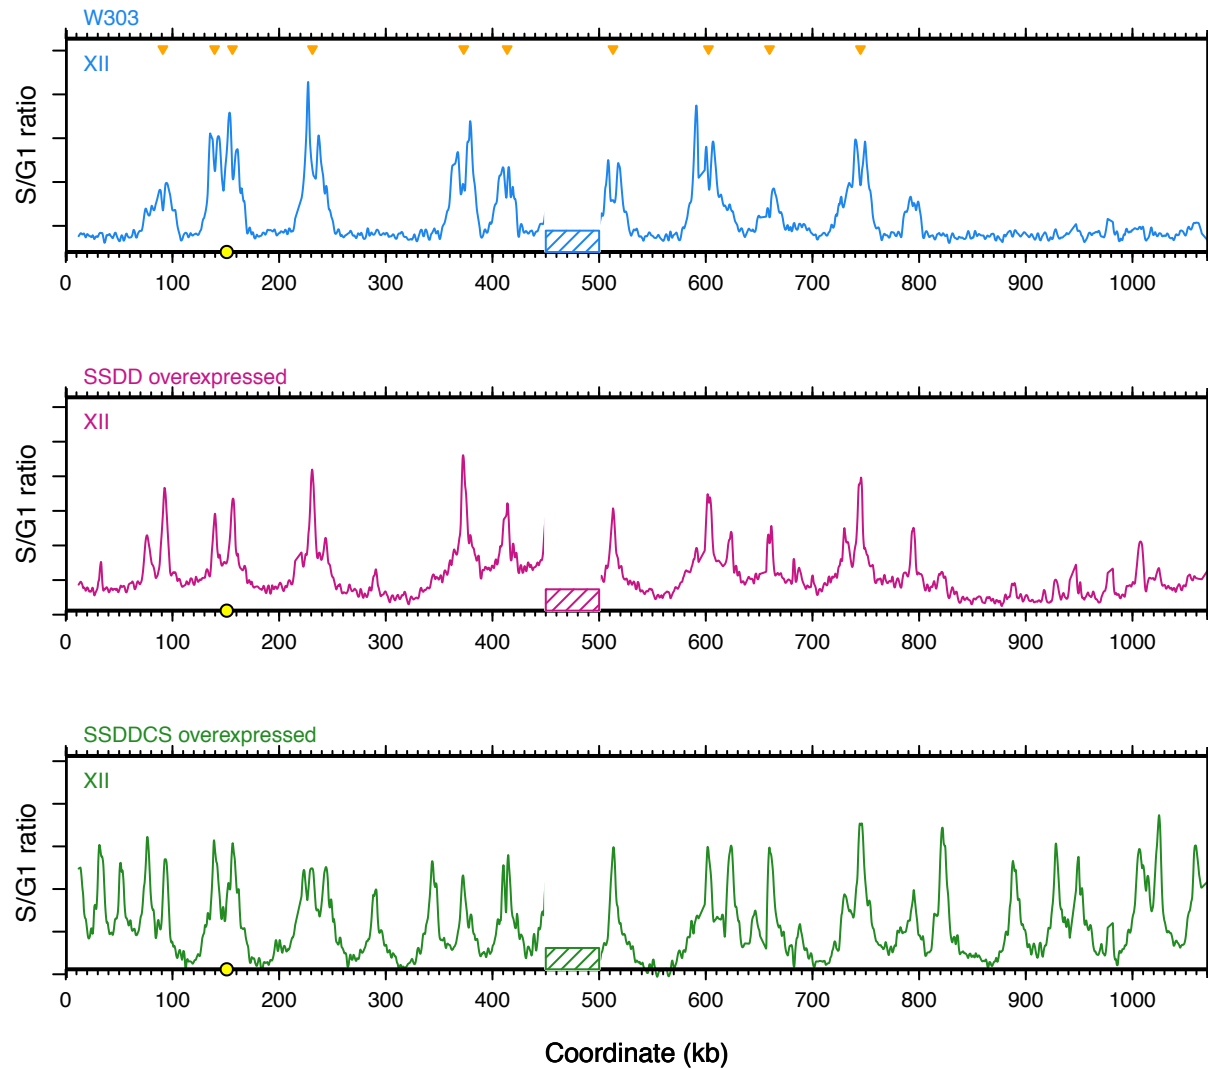

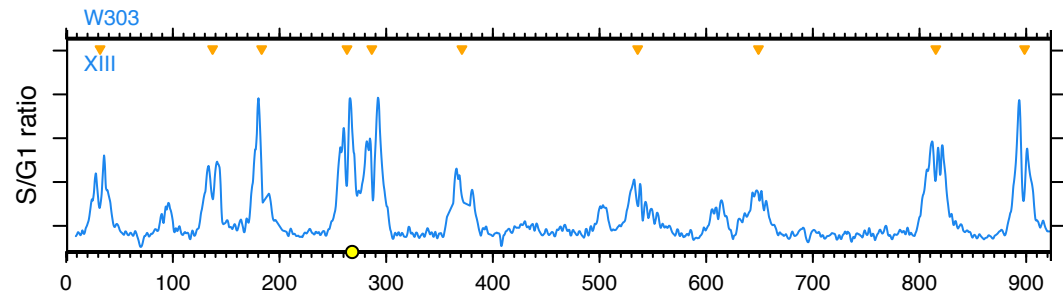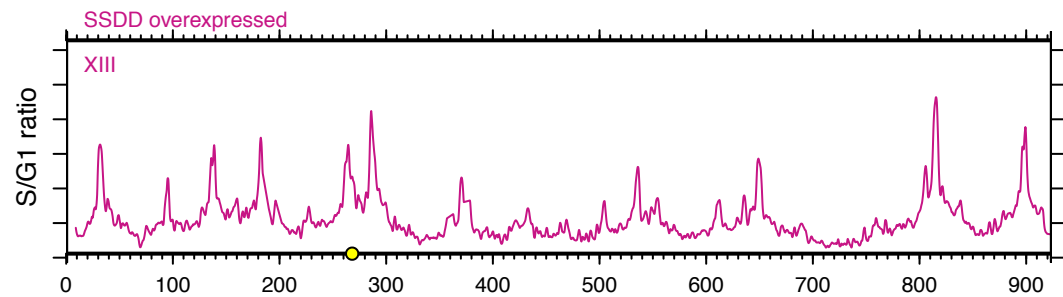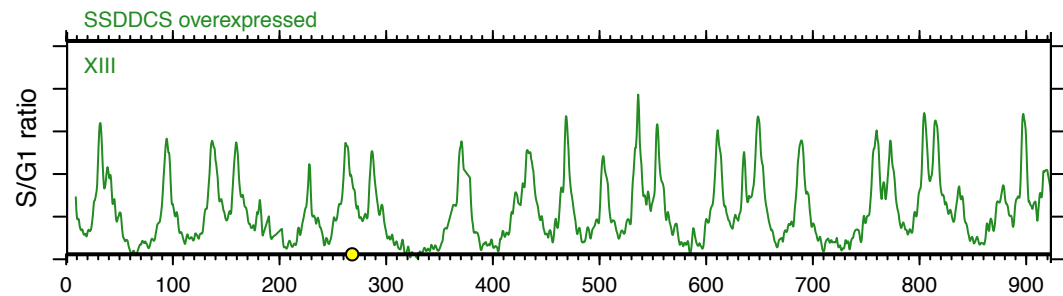

Coordinate (kb)

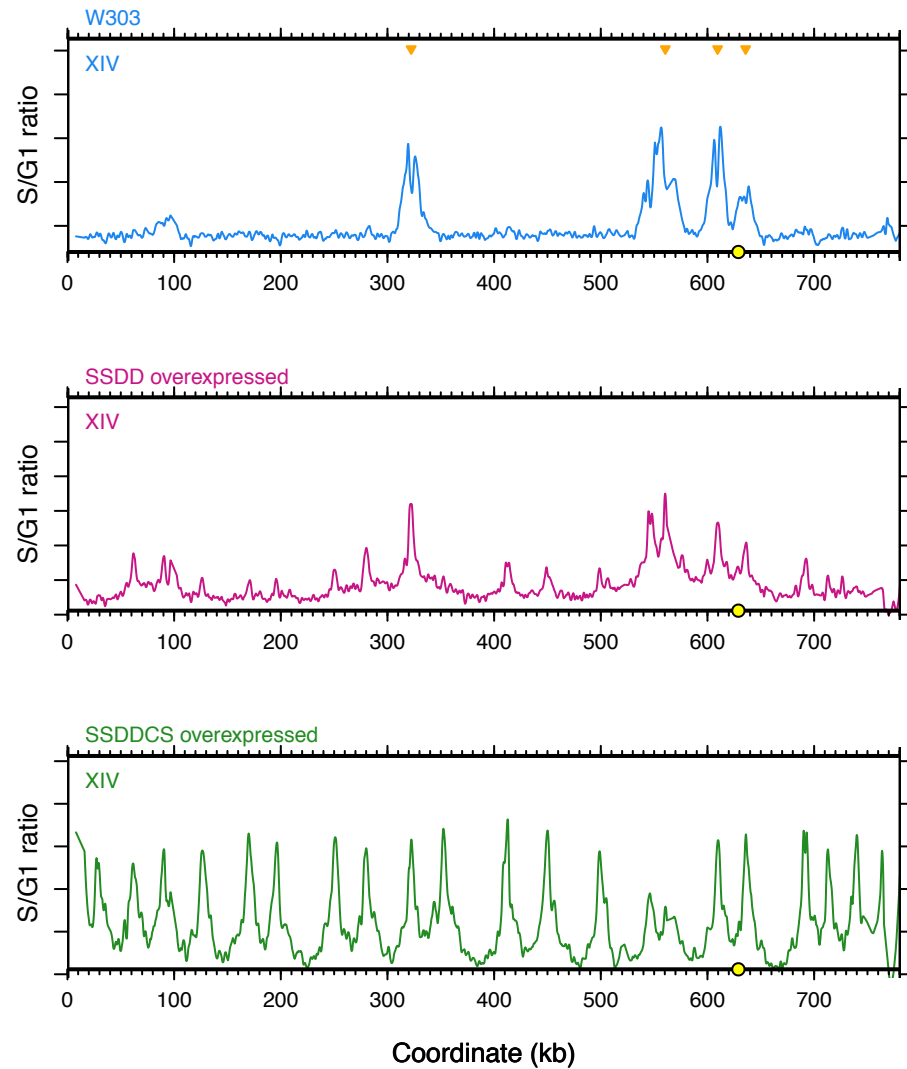

Lynch S12 Fig

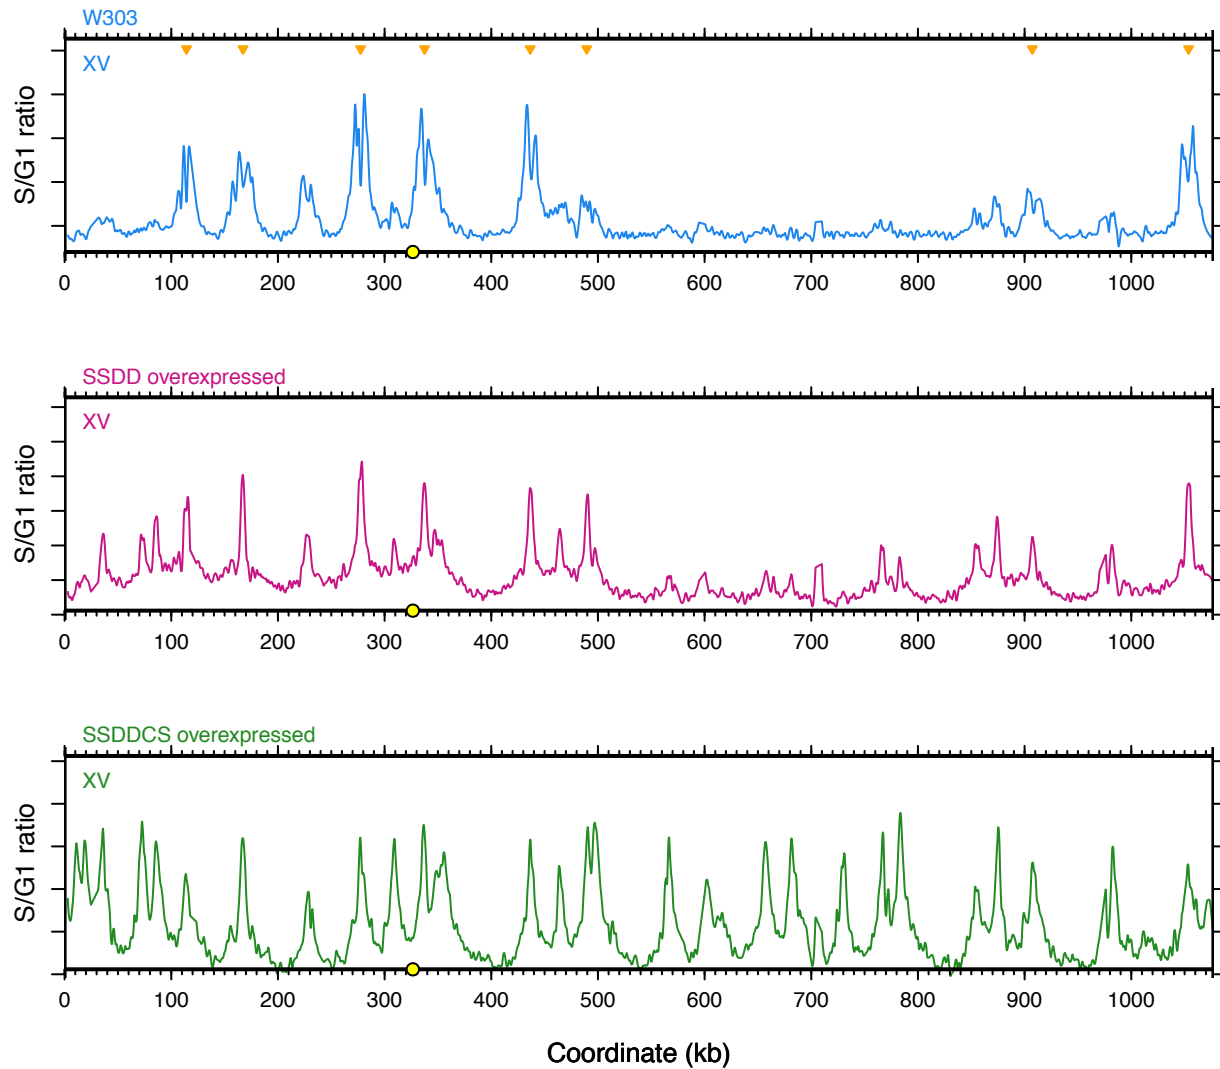



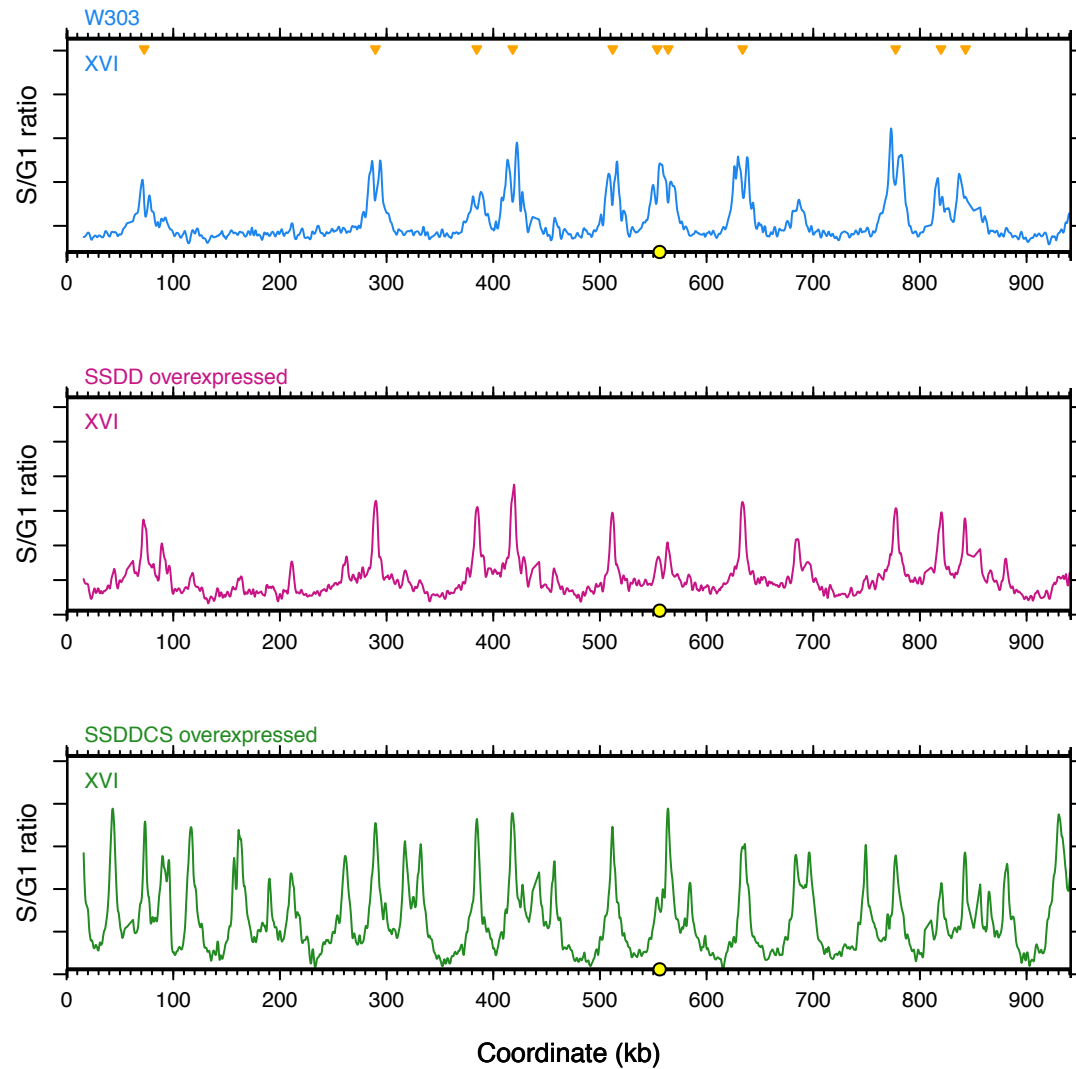

Supplement: pgen.1008430.s012.pdf [file pgen.1008430.s012.pdf]
