# Supplementary material for: The effects of manipulating levels of replication initiation factors on origin firing efficiency in yeast
Source: PubMed Central journal article supplement (PMC6795477; doi:10.1371/journal.pgen.1008430), 2019-10-04

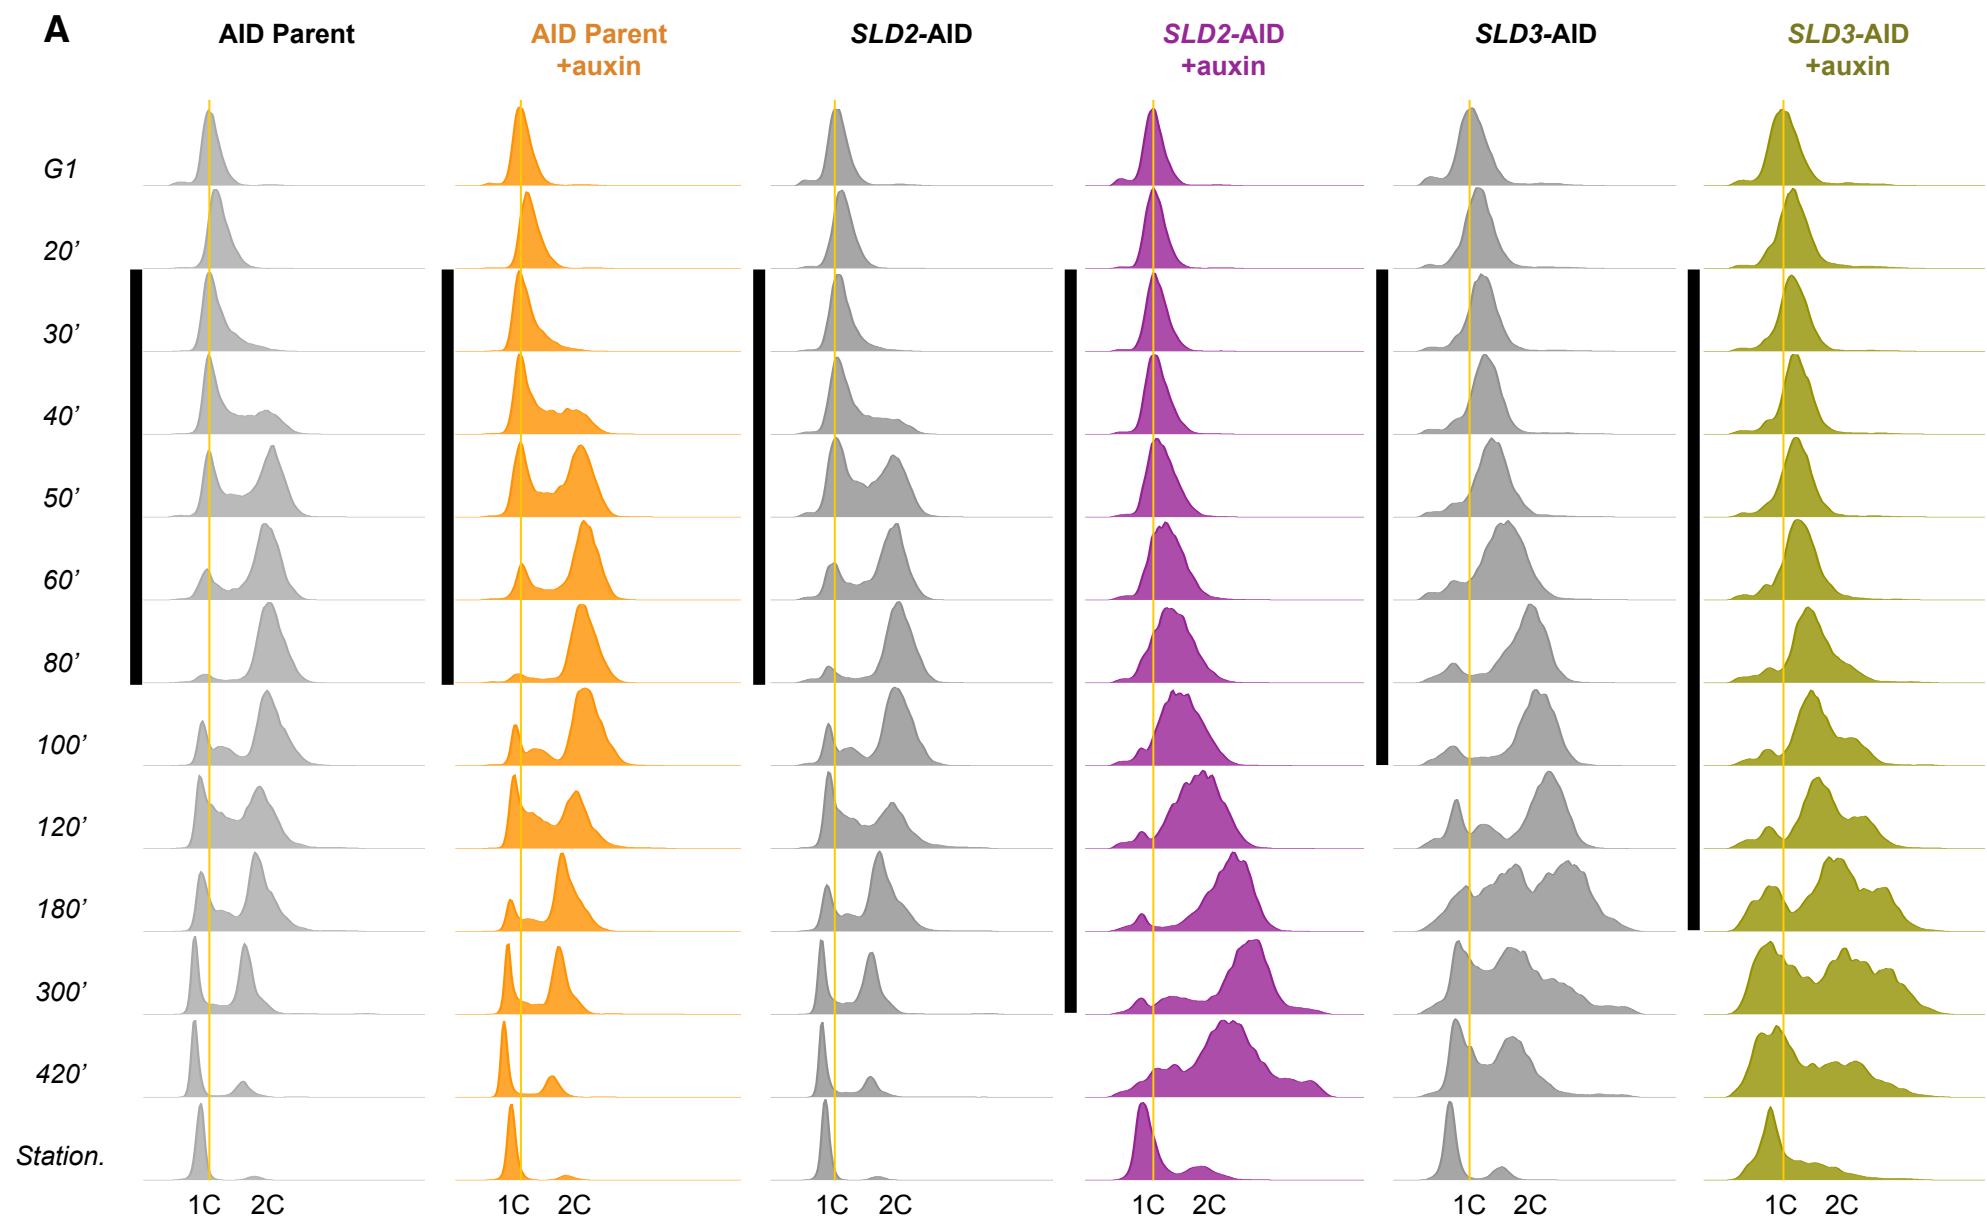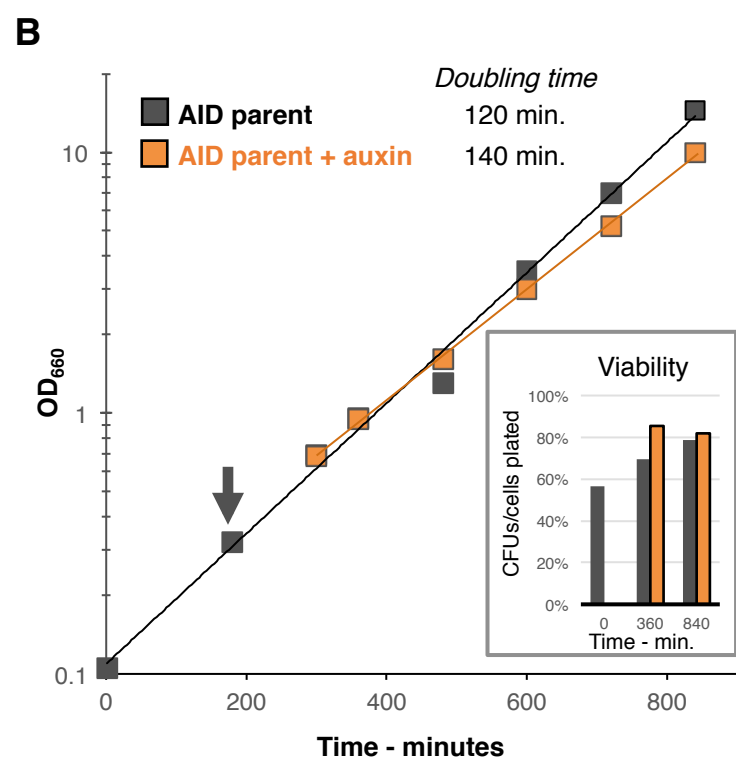

**C**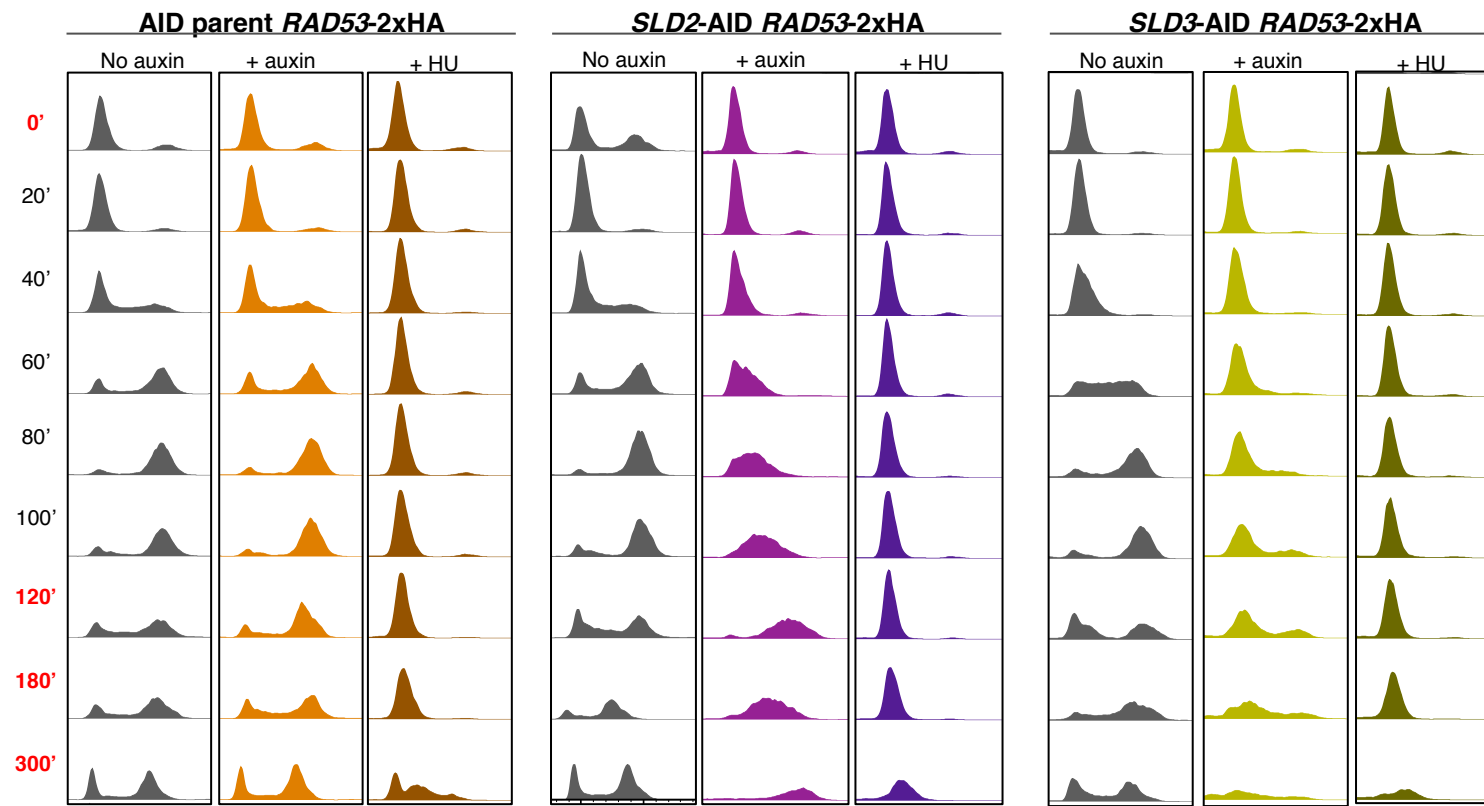**D**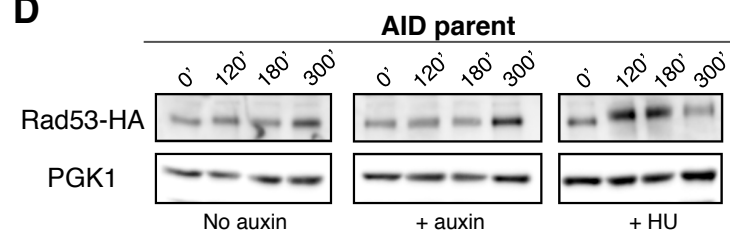

Supplement: pgen.1008430.s001.pdf [file pgen.1008430.s001.pdf]
