# Supplementary material for: The effects of manipulating levels of replication initiation factors on origin firing efficiency in yeast
Source: PubMed Central journal article supplement (PMC6795477; doi:10.1371/journal.pgen.1008430), 2019-10-04
Supplement: pgen.1008430.s011.pdf [file pgen.1008430.s011.pdf]

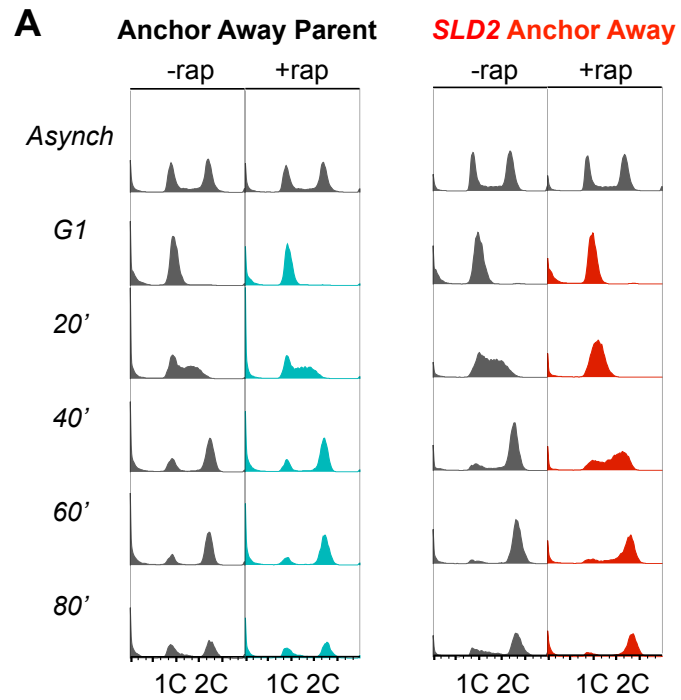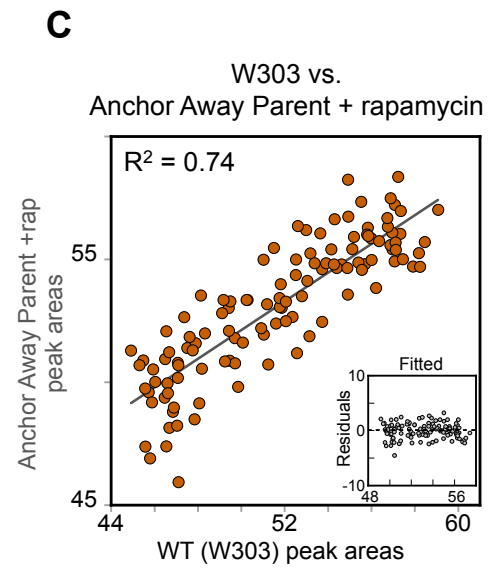

**B** Chromosome XII – ssDNA replication profile

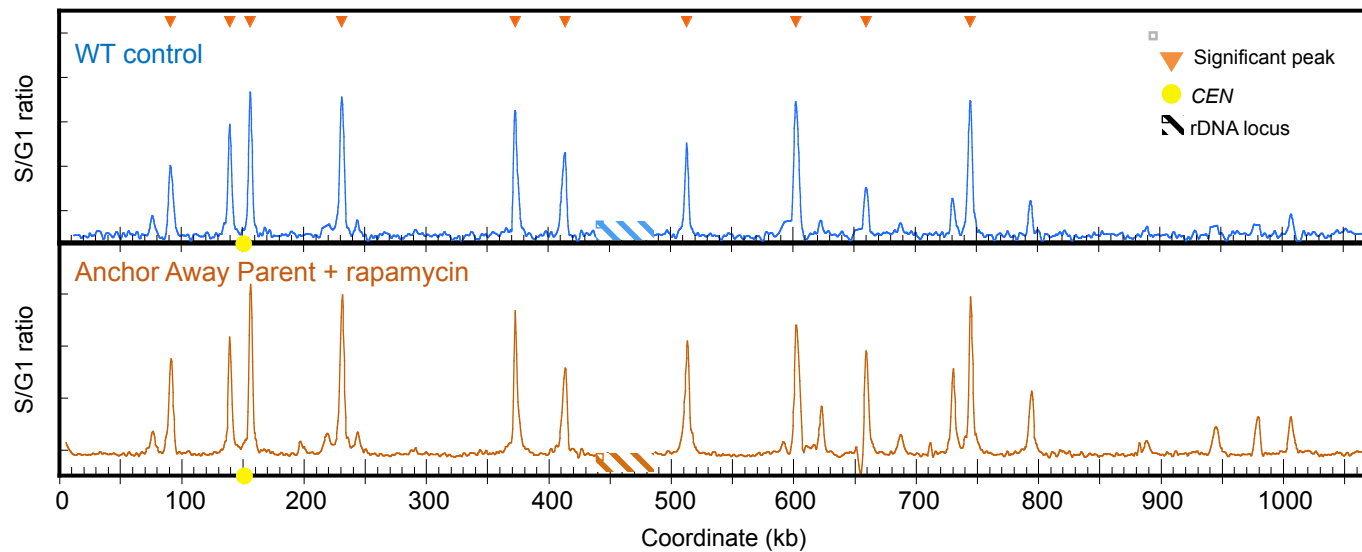

**D**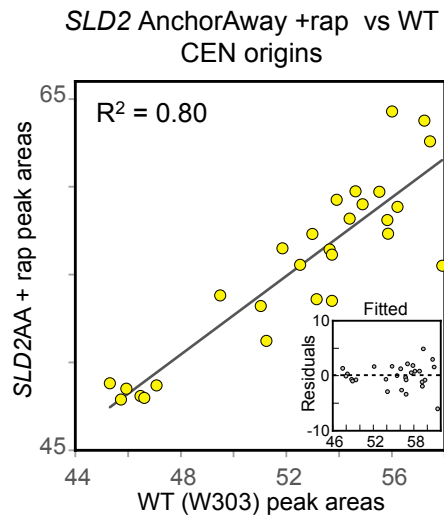**E**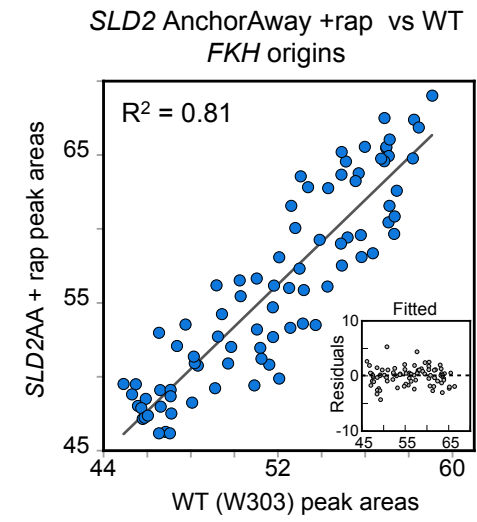

**F**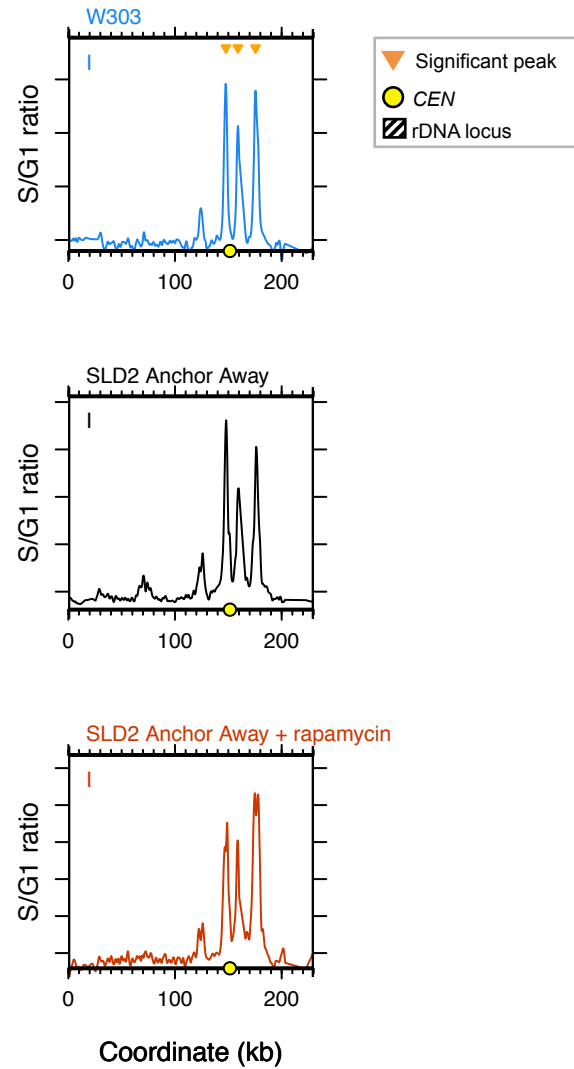

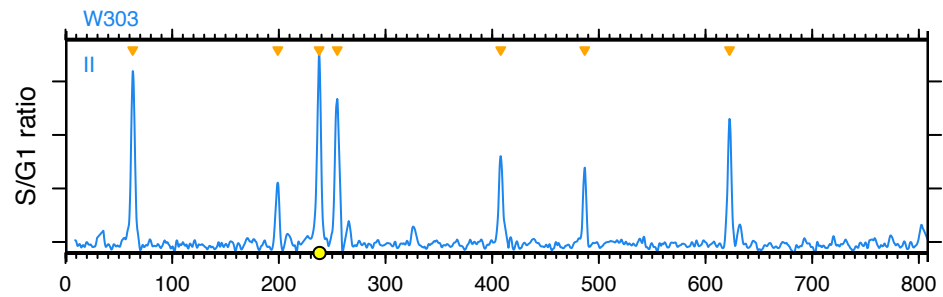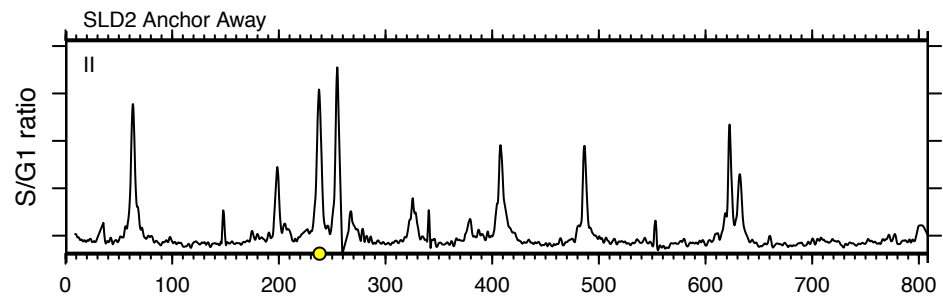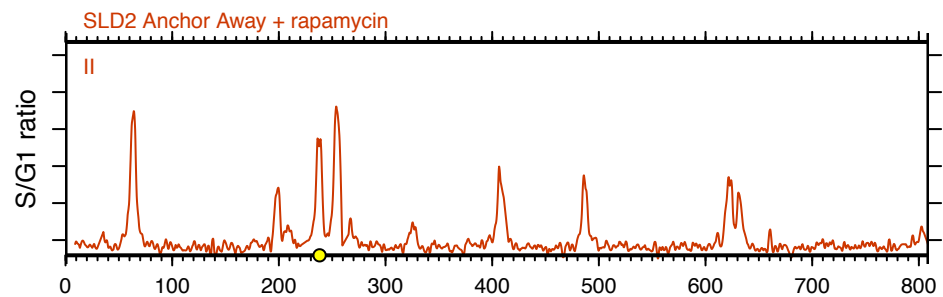

Coordinate (kb)

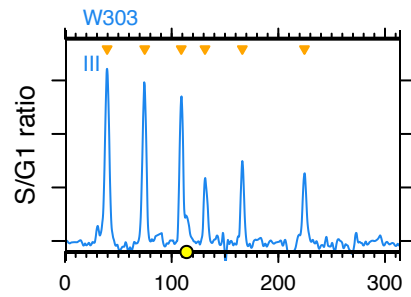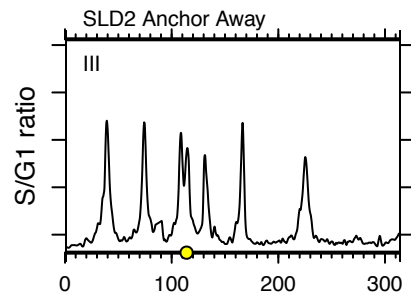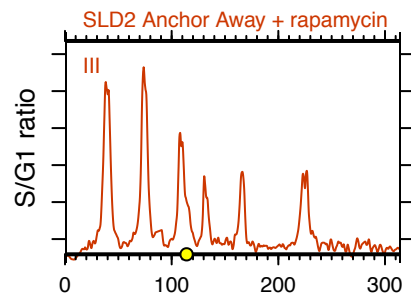

Coordinate (kb)

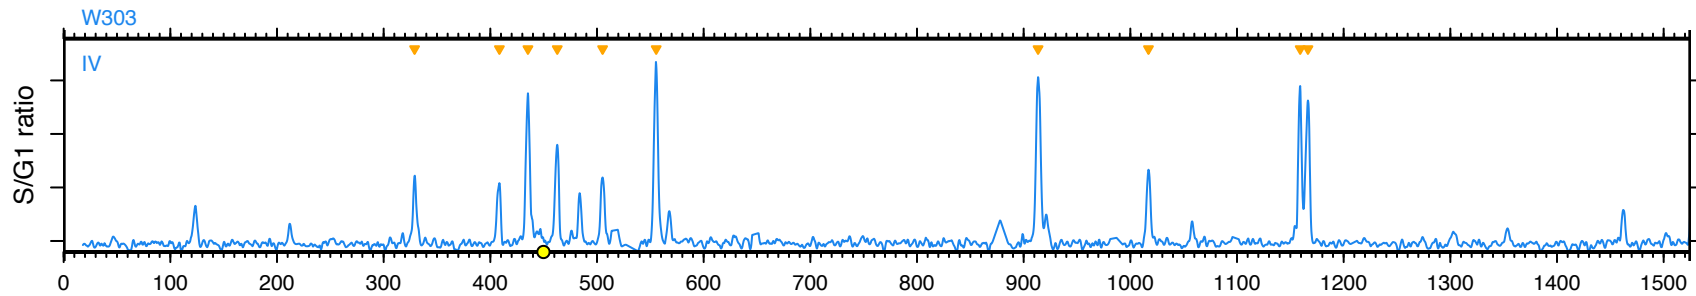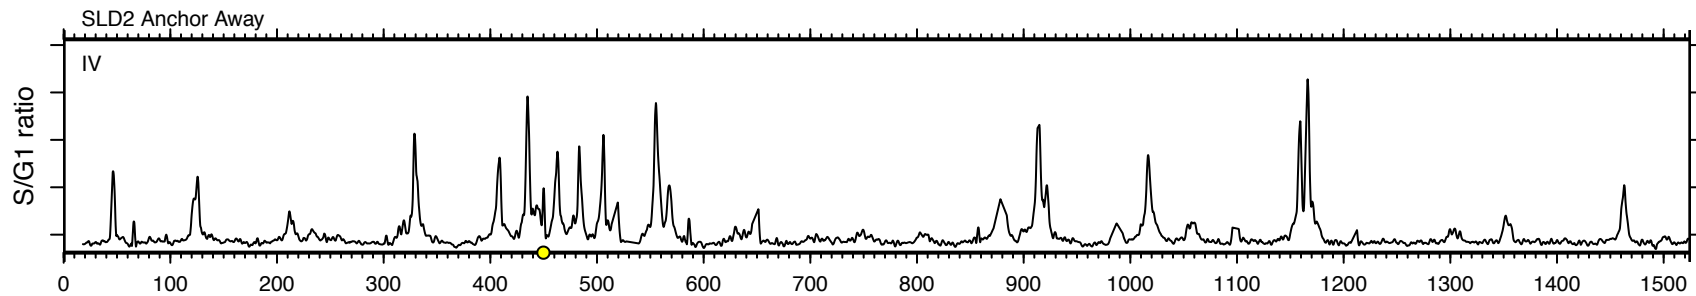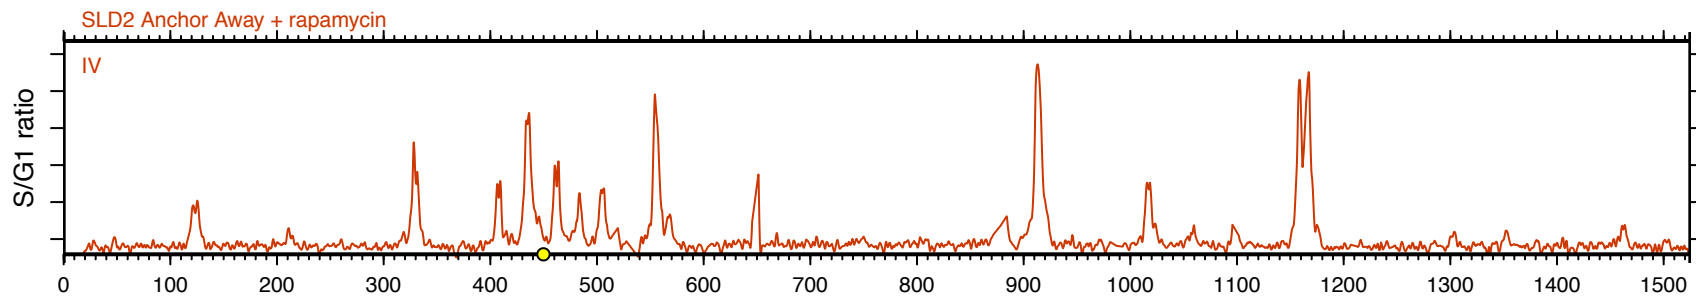

Coordinate (kb)

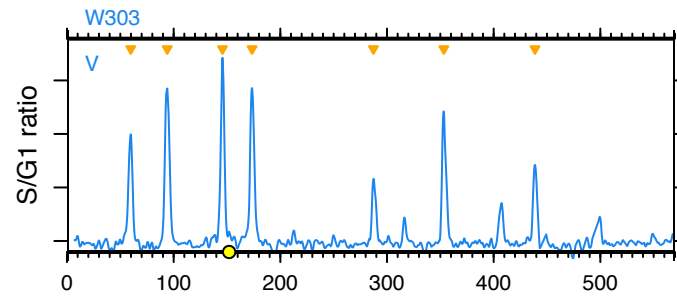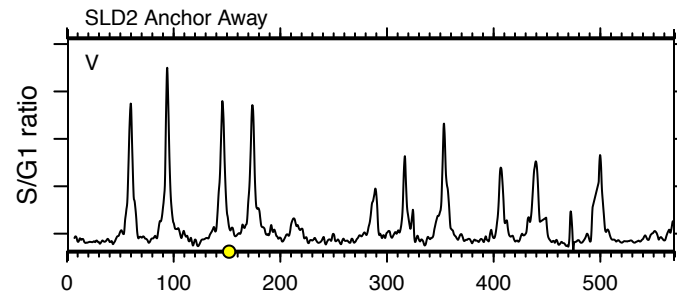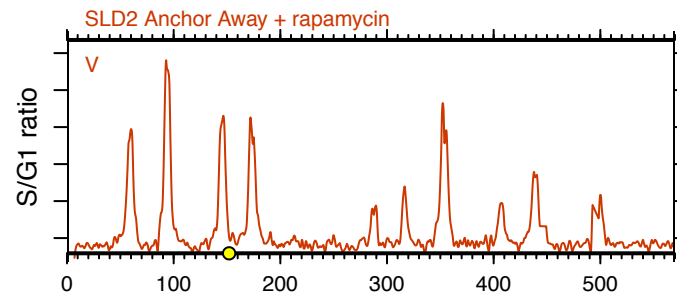

Coordinate (kb)

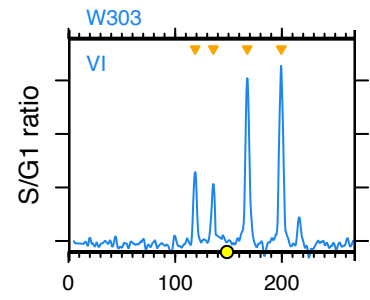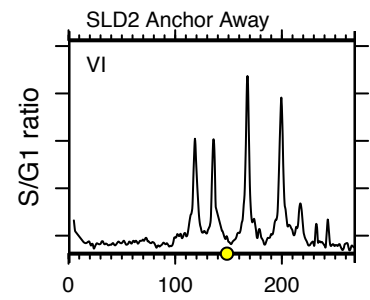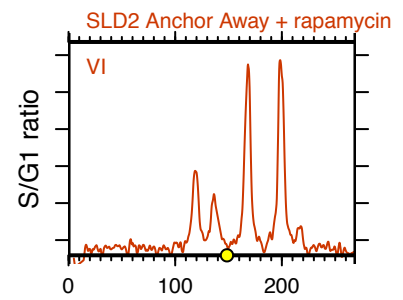

Coordinate (kb)



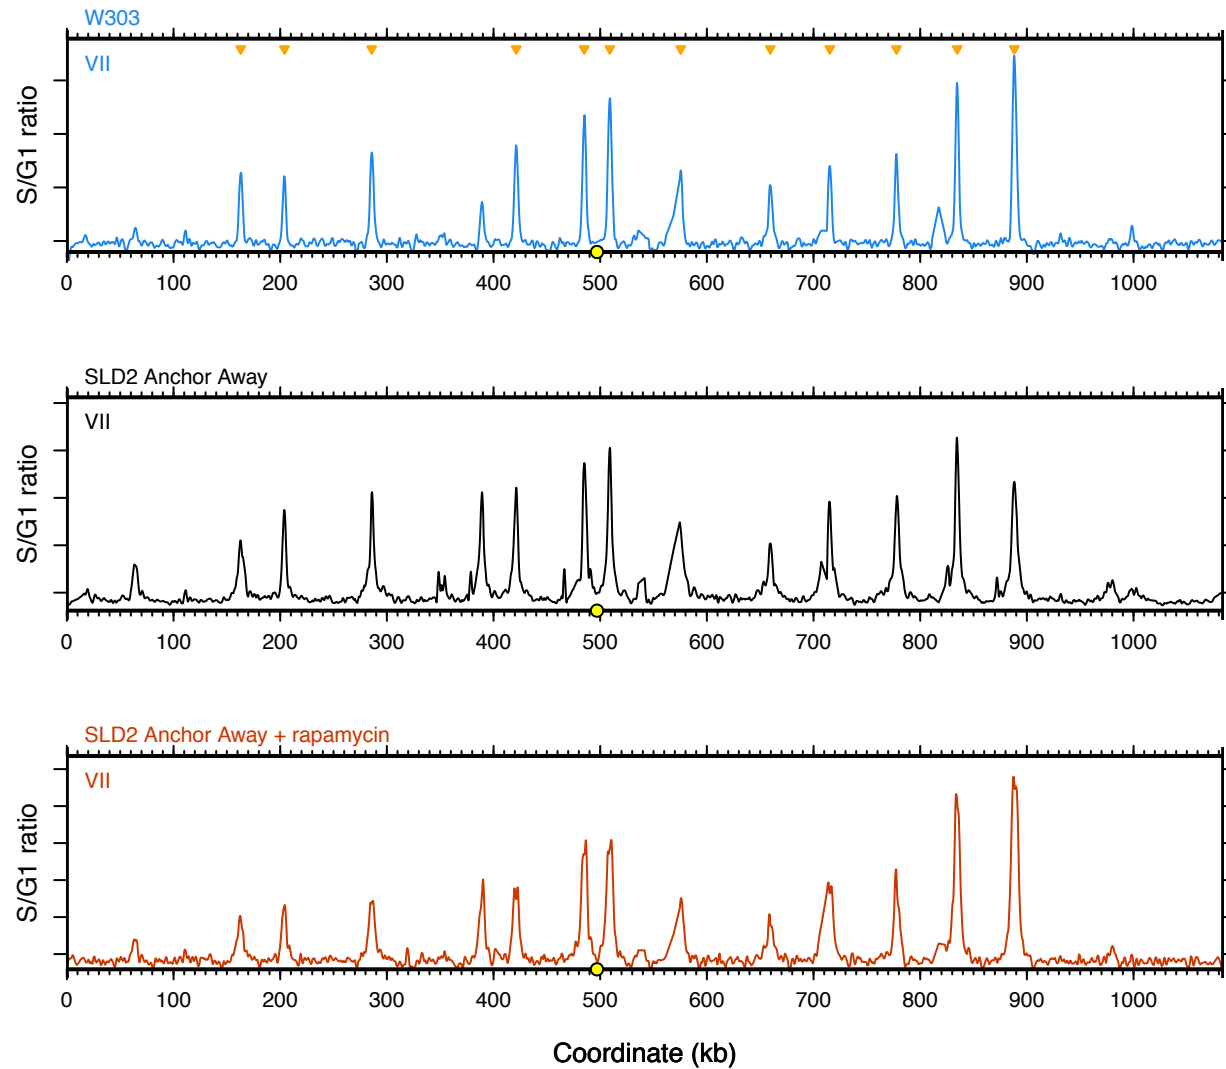

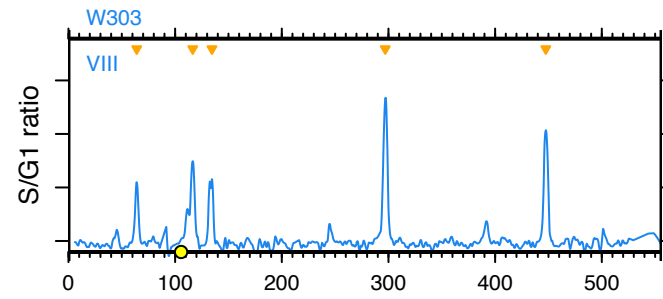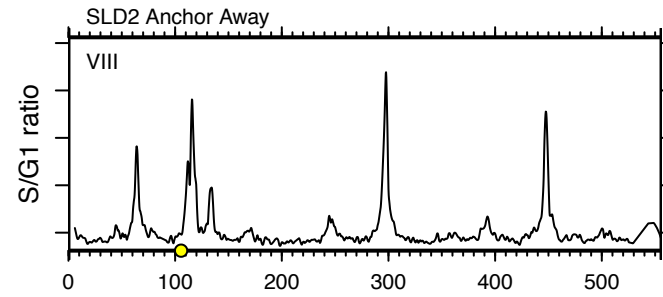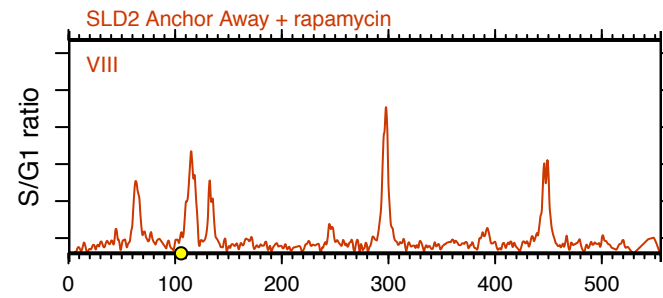

Coordinate (kb)

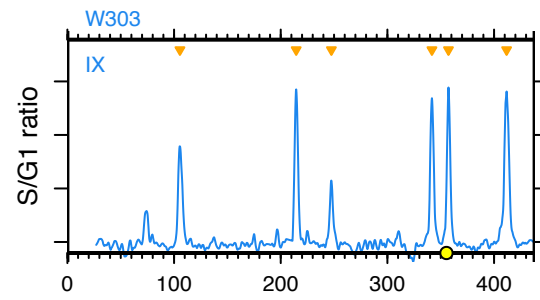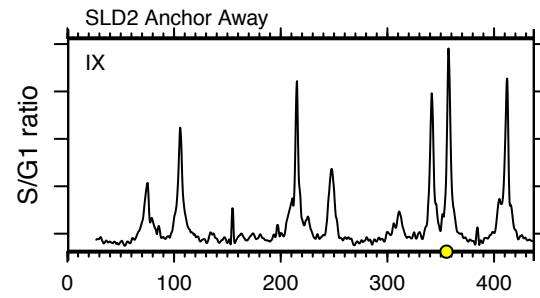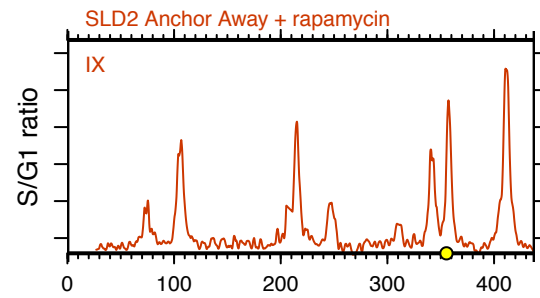

Coordinate (kb)

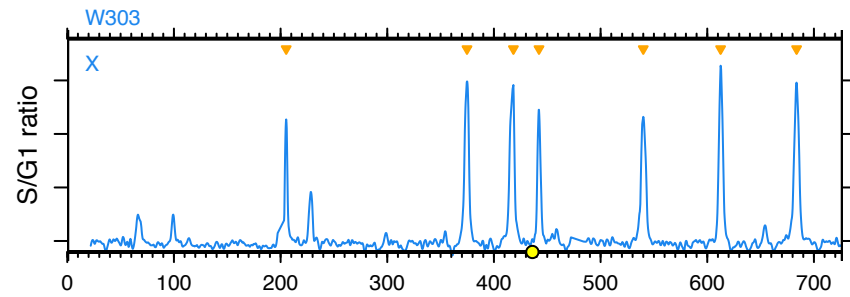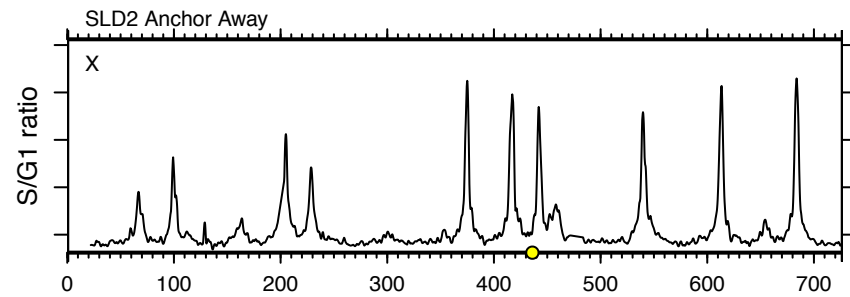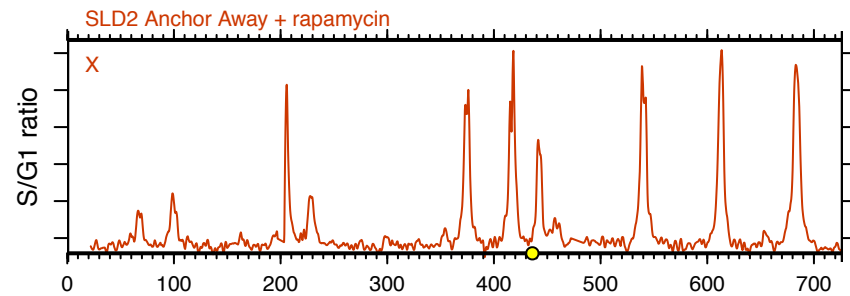

Coordinate (kb)

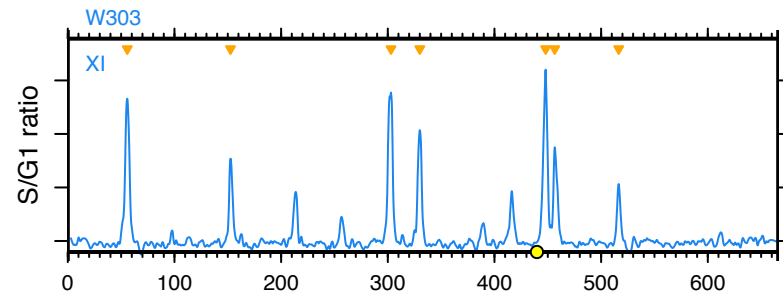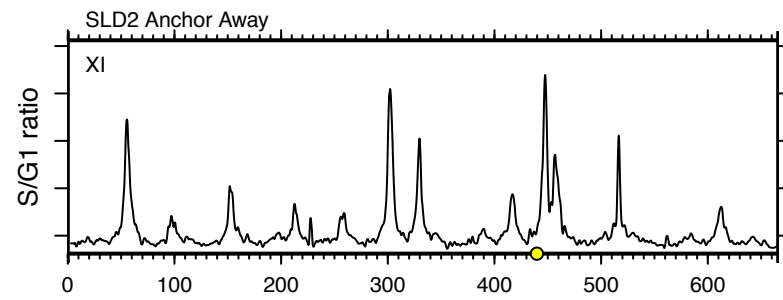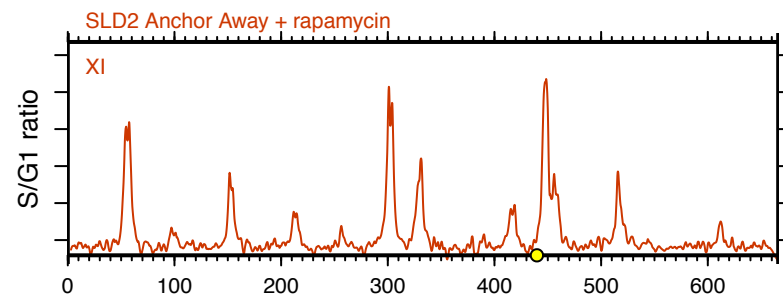

Coordinate (kb)

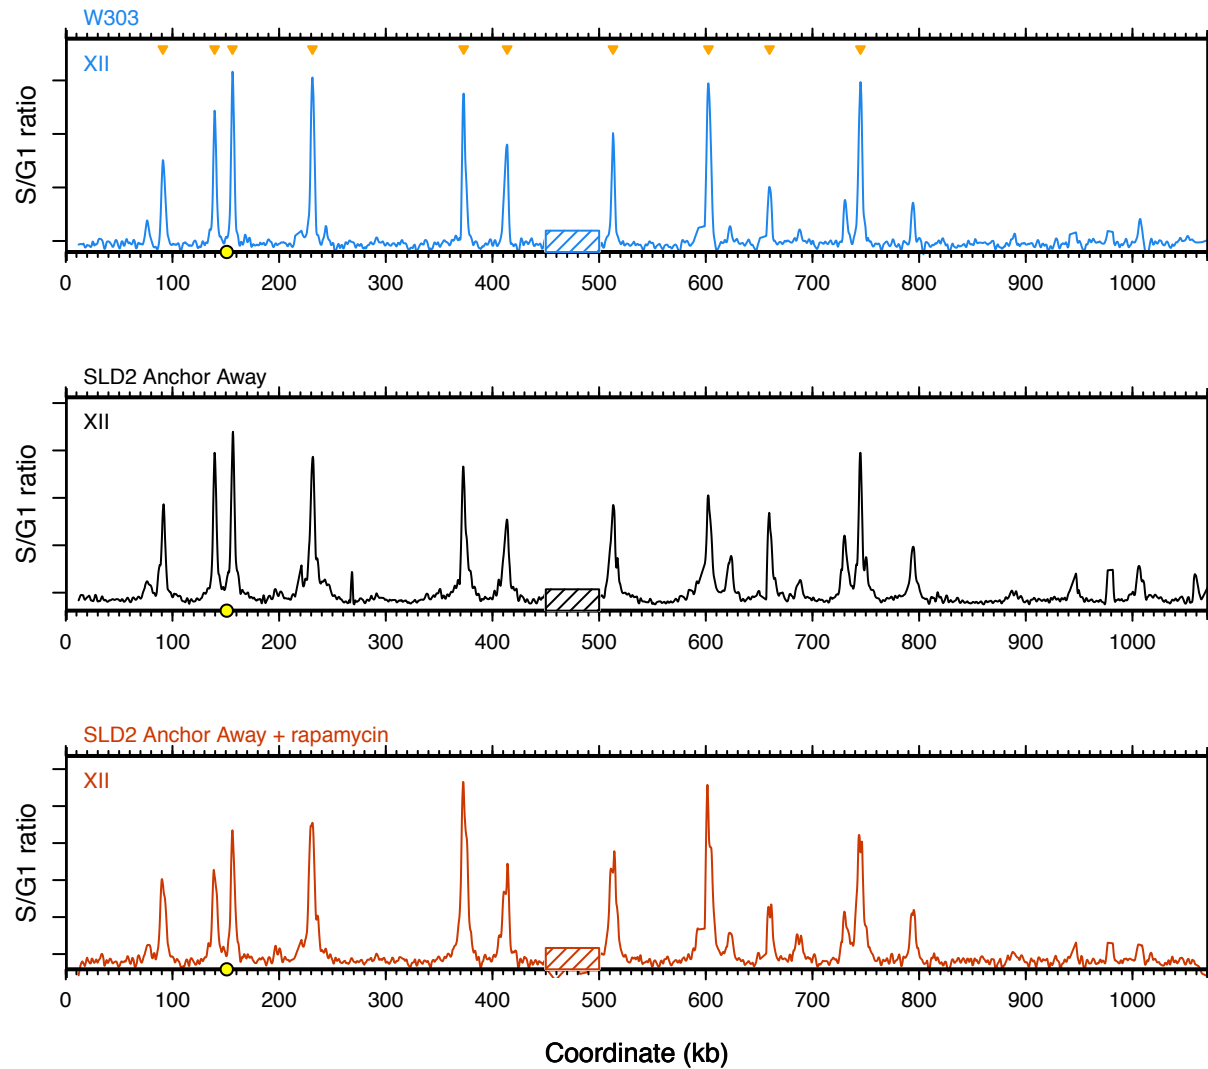

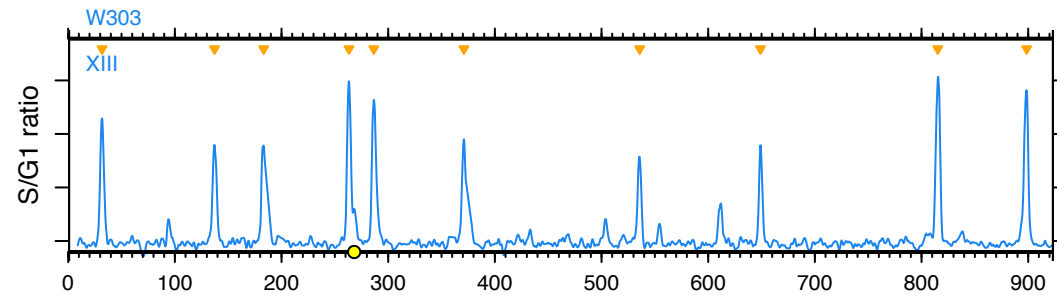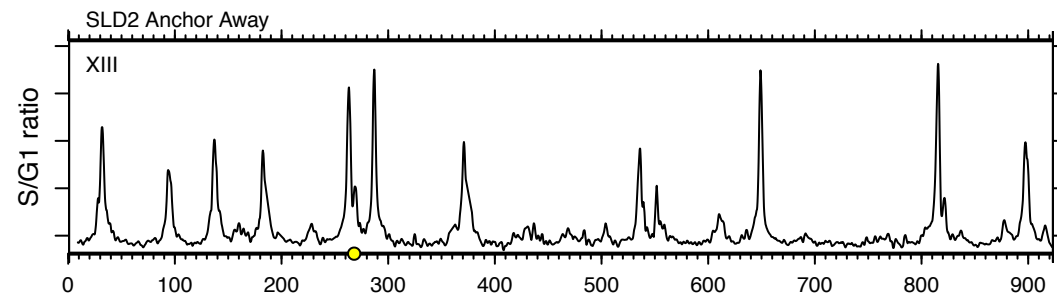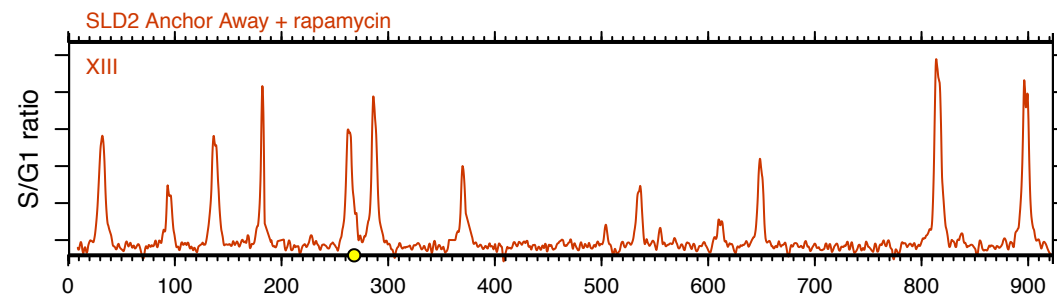

Coordinate (kb)

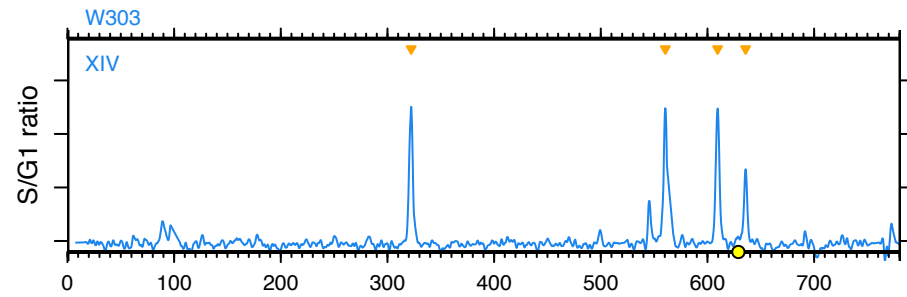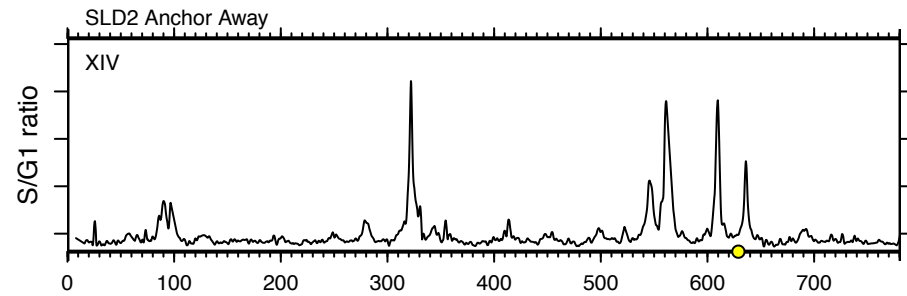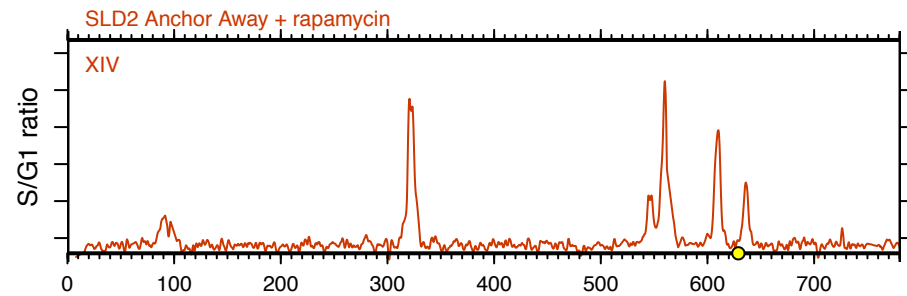

Coordinate (kb)



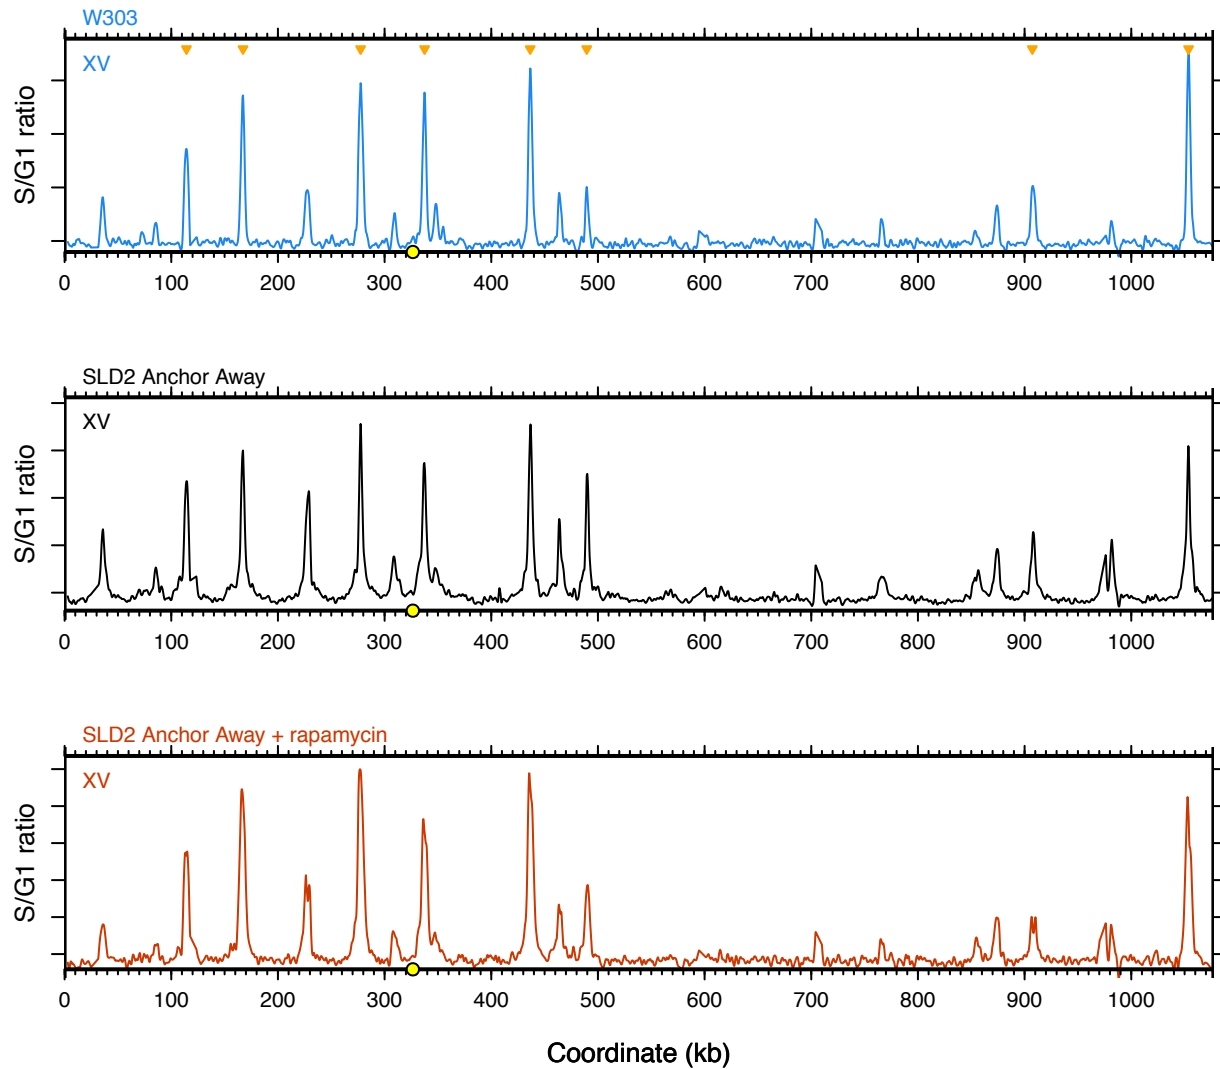

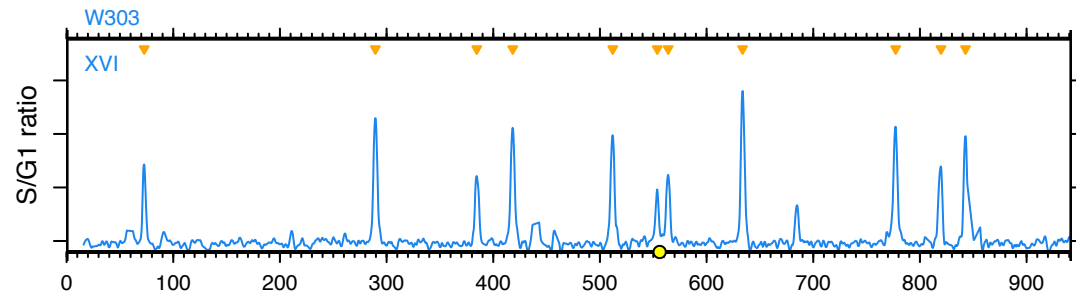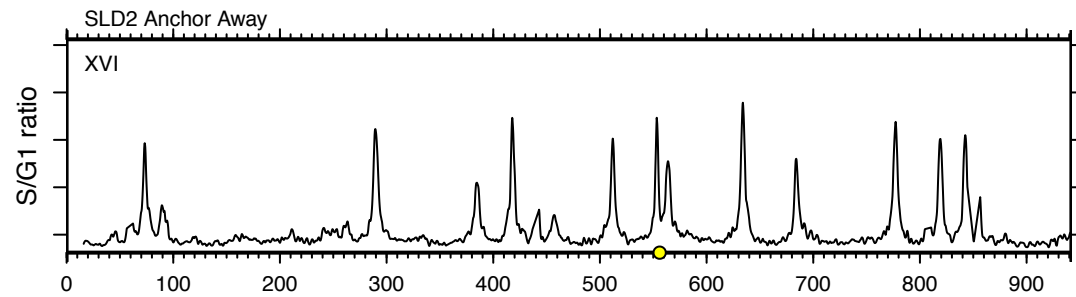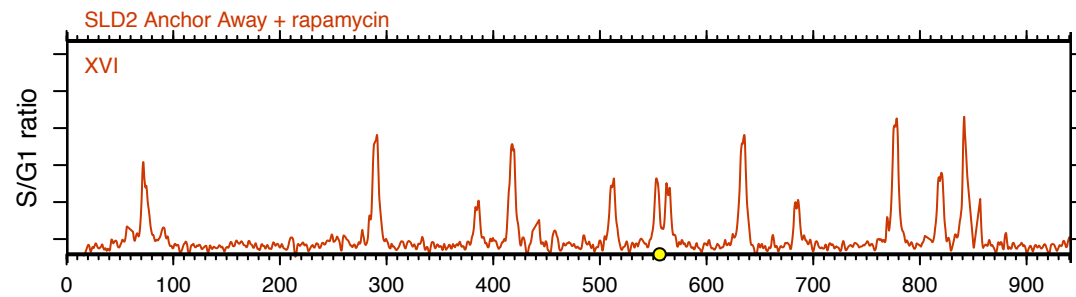

Coordinate (kb)
